# Supplementary material for: Preparation of aryl polysulfonates via a highly efficient SuFEx click reaction, their controllable degradation and functionalized behavior
Source: Royal Society of Chemistry journal article supplement (doi:10.1039/d0py00435a), 2020-01-01
Supplement: d0py00435a1.pdf [file d0py00435a1.pdf]

## Supporting Information

# Preparation of Aryl Polysulfonates via a highly efficient SuFEx click reaction, their controllable degradation and functionalized behavior

Zhenlei Cao<sup>a</sup>, Feng Zhou<sup>a</sup>, Pei-Yang Gu<sup>a</sup>, Dongyun Chen<sup>a</sup>, Jinghui He<sup>a</sup>, John Ra Cappiello<sup>b</sup>, Peng Wu<sup>c</sup>, Qingfeng Xu<sup>\*a</sup>, and Jianmei Lu<sup>\*a</sup>

<sup>a</sup>College of Chemistry, Chemical Engineering and Materials Science, Collaborative Innovation Center of Suzhou Nano Science and Technology, Soochow University, No. 199, Ren'ai Road, Suzhou 215123, China

<sup>b</sup>Department of Chemistry, The Scripps Research Institute, La Jolla, California 92037, United States

<sup>c</sup>Department of Molecular Medicine, The Scripps Research Institute, La Jolla, California 92037, United States

## Table of Contents

|                                                                                                                                |    |
|--------------------------------------------------------------------------------------------------------------------------------|----|
| Experimental .....                                                                                                             | 2  |
| Materials.....                                                                                                                 | 2  |
| Characterization .....                                                                                                         | 2  |
| Synthesis of Monomers.....                                                                                                     | 3  |
| The preparation of aryl bis(fluorosulfates). .....                                                                             | 5  |
| The preparation of Small molecules .....                                                                                       | 8  |
| The preparation of catalyst [(Ph <sub>3</sub> P=N-PPh <sub>3</sub> ) <sup>+</sup> HF <sub>2</sub> <sup>-</sup> ] (0.2 M) ..... | 8  |
| Synthesis of polymers .....                                                                                                    | 9  |
| Synthesis of polysulfonates.....                                                                                               | 9  |
| Synthesis of polysulfates.....                                                                                                 | 11 |
| Table S1: The reaction conditions and GPC results of Polysulfates.....                                                         | 13 |
| Table S2: Degradation behavior of PSFO1 in different organic bases or solvent .....                                            | 13 |
| Table S3: Degradation behavior of PSFO1 in different amounts of catalys.....                                                   | 13 |
| Figure S1: Plot of the molecular weight (Mn ps) of PSFA1 and PSFO1 vs reaction time at 100°C                                   | 14 |
| Figure S2: LC-MS analysis of the reaction.....                                                                                 | 14 |
| Figure S3: <sup>1</sup> H NMR spectra of PSFO2-TPE.....                                                                        | 15 |
| Table S3: The molecular weight (Mn ps) of PSFO1 use 3 catalysts vs reaction time at 100°C.....                                 | 15 |
| Figure S4: Plot of the molecular weight (Mn ps) of PSFO1 use 3 catalysts vs reaction time at 100°C .....                       | 16 |
| Figure S5: IR spectra of PSFO2 and PSFO2-OTBS; TPE-OTBS .....                                                                  | 16 |
| Figure S6: MALDI-TOF mass spectrum of the polymer PSFO1 treated with DBU.....                                                  | 17 |
| Figure S7: FTIR spectra of polymer PSFO1 treating by DBU.....                                                                  | 17 |

|                                                                             |    |
|-----------------------------------------------------------------------------|----|
| Preparation of PSFO1-OCH <sub>3</sub> .....                                 | 17 |
| Preparation of PSFO2-TPE .....                                              | 18 |
| Preparation of PSFO1-TPP-CF <sub>3</sub> .....                              | 18 |
| Copies of the NMR spectra .....                                             | 19 |
| Thermal gravimetric analysis (TGA) of Polysulfonates and polysulfates ..... | 41 |
| IR Spectroscopic Analysis .....                                             | 45 |
| GPC Results .....                                                           | 46 |

# Experimental

## Materials

All the materials General Methods. All starting materials were purchased from Aldrich, Acros, AKScientific, Fisher, Lancaster, VWR, or TCI chemical companies and used as received. Solvents were purchased from Fisher or VWR and used without extra drying, distillation or special handling practices.

## Characterization

<sup>1</sup>H NMR and <sup>13</sup>C NMR <sup>19</sup>F NMR spectra were recorded using INOVA 400 or 600 MHz NMR spectrometers, with CDCl<sub>3</sub> or DMSO-*d*<sub>6</sub> or DMF-*d*<sub>7</sub> as the solvent and tetramethylsilane (TMS) as the internal standard at ambient temperature. The molecular weights and polydispersity index (PDI), relative to PS, were measured using a Waters 1515 GPC with THF/DMF as a mobile phase at a flow rate of 1 mL min<sup>-1</sup> and with a column temperature of 30 °C. UV-visible absorption spectra were recorded on a Shimadzu RF540 spectrophotometer. Room temperature emission spectra were recorded using an Edinburgh-920 fluorescence spectrophotometer. Thermogravimetric analysis (TGA) was performed on a TA Instruments Dynamic TGA 2950 at a heating rate of 10 °C min<sup>-1</sup> under an N<sub>2</sub> flow rate of 50 mL min<sup>-1</sup>. Differential scanning calorimetry (DSC) analysis was performed on a Shimadzu DSC 860A 85 instrument at a heating rate of 10°C /min under N<sub>2</sub>. Percoated Merck F-254 silica gel plates were used for thin layer analytical chromatography (TLC) and visualized with short wave UV light or by potassium permanganate stain. gas. Matrix-assisted laser desorption/ionization–time-of-flight (MALDI-TOF) MS spectra were obtained using a ABI 4700 MALDI TOF/TOF. Spectra of sequence polymers

were recorded in linear mode (polarity: positive). *trans*-2-[3-(4-*tert*-Butylphenyl)-2-methylpropenylidene]-malononitrile (DCTB, 20 mg/mL in THF) was used as the matrix and CF<sub>3</sub>COONa (1 mg/mL in THF) as the cation source for all the polymers. 20 μL of polymer solution (1 mg/mL in THF), 20 μL of DCTB solution, and 2 μL of CF<sub>3</sub>COONa solution were mixed in an Eppendorf tube, vortexed, and centrifuged. 1 μL of solution was placed on the target plate spot, the solvent evaporated at ambient condition for the measurement.

## Synthesis of Monomers

### The preparation of aromatic bis(sulfonyl fluoride).

General procedure for the preparation of aromatic bis(sulfonyl fluoride).S1 was adapted as an example.

#### (1) Biphenyl-4,4'-disulfonyl difluoride (S1)

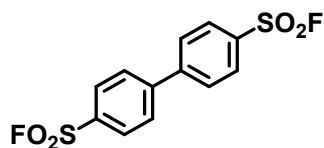

Biphenyl-4,4'-disulfonylchloride (5.0 g) was dissolved in 40 mL acetonitrile and 5 mL water with stirring. To this mixture was added 4 equiv. of saturated aqueous KHF<sub>2</sub> (4.9 g). The reaction was allowed to proceed 3 h. The mixture was extracted twice with 30 mL ethyl acetate. The organic fractions were combined, washed with water, brine, and then dried over MgSO<sub>4</sub>. Solvent was removed under vacuum to provide as a yellow solid (4.1 g, 90%); <sup>1</sup>H NMR (400 MHz, Chloroform-*d*) δ 8.24 (d, *J* = 8.1 Hz, 4H), 7.94 (d, *J* = 8.0 Hz, 4H). <sup>13</sup>C NMR (151 MHz, Chloroform-*d*) δ 145.74, 133.45, 133.29, 129.32, 128.71. <sup>19</sup>F NMR (564 MHz, Chloroform-*d*) δ 66.32.

#### (2) naphthalene-2,7-disulfonyl difluoride(S2)

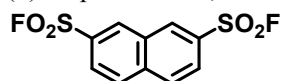

Naphthalene-2,7-disulfonate (1.0 g, 3.54 mmol) was added to phosphorus pentachloride (0.835 g, 7.08 mmol). The mixture was heated under reflux for 16 hours and then cooled to room

temperature. The solution was quenched with  $\text{CHCl}_3$ . The organic layer was dried with  $\text{MgSO}_4$  and concentrated to give the desired compound. The solvent of the collected organic phase was removed under reduced pressure to give naphthalene-2,7-disulfonyldichloride. The solid residue was recrystallized from  $\text{CHCl}_3$  (15 mL). Naphthalene-2,7-disulfonyl dichloride was dissolved in acetonitrile, potassium fluorohydride was dissolved in water, and the two solutions were mixed and stirred at room temperature for 24 hours. After completion of the reaction, the mixture was extracted with EtOAc. The organic fractions were combined, washed with water, brine, and then dried over  $\text{MgSO}_4$ . Solvent was removed under vacuum to provide as a colourless solid. (0.73 g, 73%)  $^1\text{H}$  NMR (400 MHz, Chloroform-*d*)  $\delta$  8.88 (s, 2H), 8.28 (s, 4H).  $^{13}\text{C}$  NMR (151 MHz, Chloroform-*d*)  $\delta$  138.33, 132.77, 132.60, 132.11, 130.52, 126.48.  $^{19}\text{F}$  NMR (564 MHz, Chloroform-*d*)  $\delta$  66.30.

(3) Benzene-1,3-disulfonyl fluoride (S3)

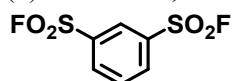

To benzene-1,3-disulfonic acid disodium salt (25.0 g, 88.6 mmol) was added  $\text{PCl}_5$  (40.0 g, 193 mmol). The solid reaction mixture was then stirred at  $90^\circ\text{C}$  for 16 h, cooled to room temperature before the addition of  $\text{H}_2\text{O}$  (200 mL). The crude mixture was extracted with  $\text{Et}_2\text{O}$  (500 mL), washed with  $\text{H}_2\text{O}$  (500 mL) and dried over anhydrous  $\text{MgSO}_4$ . Removal of the solvent removed under reduced pressure gave the crude product benzene-1,3-disulfonyl dichloride. benzene-1,3-disulfonyl dichloride was dissolved in acetonitrile, potassium fluorohydride was dissolved in water, and the two solutions were mixed and stirred at room temperature for 24 hours. After completion of the reaction, the mixture was extracted with EtOAc. The organic fractions were combined, washed with water, brine, and then dried over  $\text{MgSO}_4$ . Solvent was removed under vacuum to provide as a colourless solid (18.5 g, 76%).  $^1\text{H}$  NMR (400 MHz, Chloroform-*d*)  $\delta$  8.66 (s, 1H), 8.43 (dd,  $J = 8.0, 1.9$  Hz, 2H), 7.99 (t,  $J = 8.0$  Hz, 1H).  $^{13}\text{C}$  NMR (151 MHz, Chloroform-*d*)  $\delta$  134.80, 131.62, 128.57.  $^{19}\text{F}$  NMR (564 MHz, Chloroform-*d*)  $\delta$  66.70.

(4) 4,4'-oxydibenzenesulfonyl fluoride (S4)

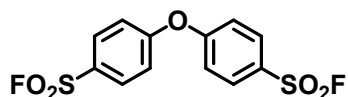

Following the general procedure above for the preparation was isolated as white powder (Yields 87%):  $^1\text{H}$  NMR (400 MHz,  $\text{DMSO-}d_6$ )  $\delta$  8.24 (s, 4H), 7.54 (s, 4H).  $^{13}\text{C}$  NMR (151 MHz, Chloroform- $d$ )  $\delta$  161.09, 131.34, 128.76, 128.59, 119.92.

### The preparation of aryl bis(fluorosulfates).

**General procedure for the preparation of aryl bis(fluorosulfates)** The synthesis of O1 was adapted as an example

(1) [1,1'-biphenyl]-4,4'-diyl bis(sulfurofluoridate) (O1)

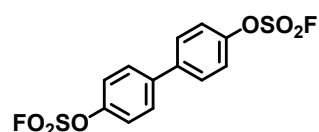

In a 1.0 L round-bottom flask equipped with a stir bar, [1,1'-biphenyl]-4,4'-diol (37.2 g, 0.2 mol) was dissolved in 400 mL  $\text{CH}_2\text{Cl}_2$ . Triethylamine (50.5 g, 0.5 mol) was added, and the solution was stirred at room temperature for 10 mins. The flask was charged with gentle vacuum, then quickly filled with  $\text{SO}_2\text{F}_2$  gas via a syringe attached balloon. The reaction mixture was allowed stirring at room temperature for 4 hours. Then  $\text{CH}_2\text{Cl}_2$  was evaporated away, and the crude product was dissolved in 200 mL EtOAc, which was subsequently washed with 100 mL aqueous HCl (1.0M, 3 times), 50 mL saturated aqueous solution of  $\text{NaHCO}_3$ , and 50 mL of saturated brine. The organic phase was concentrated and subjected to flash column chromatography purification (Hexane/EtOAc). O1 was isolated as White solid (95% yield).  $^1\text{H}$  NMR (400 MHz,  $\text{DMSO-}d_6$ )  $\delta$  7.94 (t,  $J = 5.9$  Hz, 4H), 7.76 (d,  $J = 8.3$  Hz, 4H).  $^{13}\text{C}$  NMR (151 MHz, Chloroform- $d$ )  $\delta$  145.73, 133.37 (d,  $J = 25.4$  Hz), 129.34, 128.70.  $^{19}\text{F}$  NMR (564 MHz, Chloroform- $d$ )  $\delta$  66.35.

(2) Naphthalene-2,7-diyl disulfurofluoridate (O2)

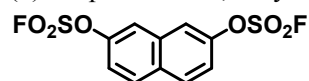

Naphthalene-2,7-diyl disulfurofluoridate O2 was prepared following literature. O2 was isolated as white powder (87%)  $^1\text{H}$  NMR (400 MHz,  $\text{DMSO-}d_6$ )  $\delta$  8.42 (d,  $J = 2.5$  Hz, 2H), 8.35 (d,  $J = 9.1$  Hz, 2H), 7.89 (dd,  $J = 9.0, 2.5$  Hz, 2H).  $^{13}\text{C}$  NMR (151 MHz, Chloroform- $d$ )  $\delta$  148.67, 133.55, 131.51, 131.05, 120.70, 119.16.  $^{19}\text{F}$  NMR (564 MHz, Chloroform- $d$ )  $\delta$  38.40.

(3) 1,3-phenylene bis(sulfurofluoridate)(O3)

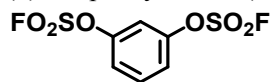

O3 was prepared Following the general procedure above for the preparation .White solid(yield 90%)<sup>1</sup>H NMR (400 MHz, DMSO-*d*<sub>6</sub>) δ 8.21 (s, 1H), 7.87 (d, *J* = 7.1 Hz, 3H). <sup>13</sup>C NMR (151 MHz, Chloroform-*d*) δ 149.93, 131.93, 121.46, 114.98. <sup>19</sup>F NMR (564 MHz, Chloroform-*d*) δ 38.60, 38.56 (d, *J* = 4.0 Hz).

(4) oxybis(4,1-phenylene) bis(sulfurofluoridate) (O4)

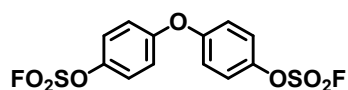

4,4'-Oxybis(4,1-phenylene) disulfofluoridate O4 was prepared following the general procedure.O4 was isolated as white crystalline solid (yield 75%) <sup>1</sup>H NMR (400 MHz, DMSO-*d*<sub>6</sub>) δ 7.67 (d, *J* = 8.7 Hz, 4H), 7.27 (d, *J* = 8.8 Hz, 4H). <sup>13</sup>C NMR (151 MHz, Chloroform-*d*) δ 156.25, 145.65, 122.69, 120.39. <sup>19</sup>F NMR (564 MHz, Chloroform-*d*) δ 37.13, 37.09.

### The preparation of monomers

(4,4'-(Propane-2,2-diyl)bis(4,1-phenylene))bis(oxy)bis(tert-butyldimethylsilane) (1a)

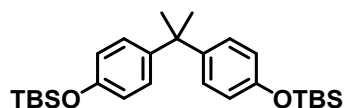

In a 500 mL round-bottom flask equipped with a stir bar, bisphenol-A (20 mmol) and imidazole(52 mmol) were combined and dissolved in 100 mL of chloromethane (CH<sub>2</sub>Cl<sub>2</sub>). The solution was stirred at room temperature for 10 mins, then was added 20 mL CH<sub>2</sub>Cl<sub>2</sub> solution of TBSCl (48mmol) dropwise within 20 mins. The resulting mixture was stirred at room temperature until the full conversion of starting compound to target product, monitored by TLC and LC-MS. Precipitates were removed by filtration. The filtrate was concentrated on rotary evaporator. The resulting crude product was dissolved in 100 mL of ethyl acetate (EtOAc), which was subsequently washed with 50 mL saturated aqueous solution of NaHCO<sub>3</sub> (3 times) and 50 mL saturated aqueous solution of NaCl. The organic phase was dried over anhydrous Na<sub>2</sub>SO<sub>4</sub>. After filtration, the filtrate was subjected to evaporation to remove EtOAc. The crude product through flash column chromatography purification(Hexane/EtOAc) as white solid.

$^1\text{H}$  NMR (400 MHz, Chloroform-*d*)  $\delta$  7.06 (d,  $J$  = 8.6 Hz, 4H), 6.71 (d,  $J$  = 8.6 Hz, 4H), 1.62 (s, 6H), 0.97 (s, 18H), 0.19 (s, 12H).  $^{13}\text{C}$  NMR (151 MHz, Chloroform-*d*)  $\delta$  153.20, 143.63, 127.62, 119.12, 41.69, 31.05, 25.65, 18.13, -4.43.

6-(3,5-bis(4-((tert-butyldimethylsilyl)oxy)phenyl)-4,5-dihydro-1H-pyrazol-1-yl)-2-butyl-1H-benzo[de]isoquinoline-1,3(2H)-dione (1b)

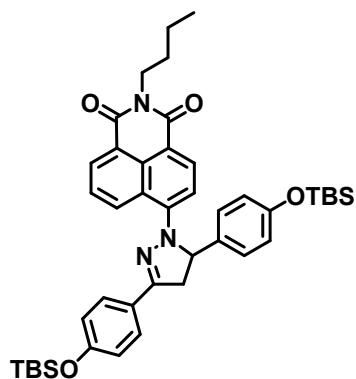

6-(3,5-bis(4-hydroxyphenyl)-4,5-dihydro-1H-pyrazol-1-yl)-2-butyl-1H-benzo[de]isoquinoline-1,3(2H)-dione (1.012g, 2mmol) and imidazole (0.354g, 5.2mmol) were dissolved in dichloromethane (40 mL). And then the solution of tert-butyldimethylsilyl chloride (0.97 g, 4.8 mmol) in the dichloromethane (4 mL) was dropwise added into the reaction mixture. The reaction mixture was allowed to stir at room temperature for 24 hrs. After the reaction was completed, the mixture was extracted with ethyl acetate and washed successively with sodium bicarbonate solution and water. The solution was removed by rotary evaporation in vacuum. And the product was purified by silica-gel column chromatography to give a pale yellow powder with a yield of 75%.

$^1\text{H}$  NMR (400 MHz, Chloroform-*d*)  $\delta$  9.68 (d,  $J$  = 8.4 Hz, 1H), 8.62 (d,  $J$  = 6.9 Hz, 1H), 8.29 (d,  $J$  = 8.2 Hz, 1H), 7.68 (d,  $J$  = 8.1 Hz, 3H), 7.18 (s, 2H), 6.92 (d,  $J$  = 7.8 Hz, 2H), 6.76 (d,  $J$  = 6.9 Hz, 3H), 5.59 (d,  $J$  = 7.7 Hz, 1H), 4.15 (s, 2H), 3.90 – 3.78 (m, 1H), 3.21 (s, 1H), 2.18 (s, 2H), 1.43 (s, 2H), 1.01 (s, 10H), 0.94 (s, 11H), 0.25 (s, 6H), 0.15 (s, 6H).

((perfluoropropane-2,2-diyl)bis(4,1-phenylene))bis(oxy))bis(tert-butyldimethylsilane) (1c)

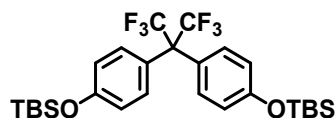

1C was prepared following literature<sup>1</sup>, compound was afforded as white solid in 91% yield.

<sup>1</sup>H NMR (400 MHz, Chloroform-*d*) δ 7.24 (d, *J* = 8.5 Hz, 4H), 6.85 – 6.74 (m, 4H), 0.99 (s, 18H), 0.23 (s, 12H). <sup>13</sup>C NMR (151 MHz, Chloroform-*d*) δ 155.97, 131.40, 126.01, 119.37, 25.57, 18.13, -4.43

### The preparation of Small molecules

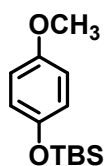

tert-butyl(4-methoxyphenoxy)dimethylsilane(TBMP-OTBS)was prepared following procedure above.

<sup>1</sup>H NMR (400 MHz, DMSO-*d*<sub>6</sub>) δ 6.77 (q, *J* = 8.7 Hz, 4H), 3.68 (s, 3H), 0.93 (s, 9H), 0.14 (s, 6H). <sup>13</sup>C NMR (151 MHz, Chloroform-*d*) δ 154.06, 149.32, 120.58, 114.44, 55.59, 25.70, 18.16, -4.52.

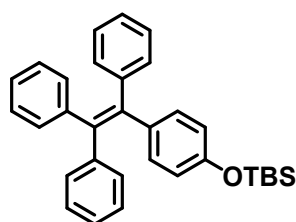

TPE-OTBS was prepared following was prepared following procedure above.

<sup>1</sup>H NMR (600 MHz, DMSO-*d*<sub>6</sub>) δ 7.12 – 7.03 (m, 9H), 6.96 – 6.89 (m, 6H), 6.82 – 6.77 (m, 2H), 6.59 – 6.55 (m, 2H), 0.87 (s, 9H), 0.09 (s, 6H).

### The preparation of catalyst [(Ph<sub>3</sub>P=N-PPh<sub>3</sub>)<sup>+</sup> HF<sub>2</sub><sup>-</sup>] (0.2 M)

[(Ph<sub>3</sub>P=N-PPh<sub>3</sub>)<sup>+</sup> HF<sub>2</sub><sup>-</sup>] was prepared following literature<sup>1</sup>. To a well stirred solution (suspension) of AgHF<sub>2</sub> (10 mmol) in CH<sub>3</sub>CN (45 mL) in a 100 mL plastic bottle (the bottle was covered by aluminum foil to avoid light) with a rubber septa was added a solution of [(Ph<sub>3</sub>P=N-PPh<sub>3</sub>)<sup>+</sup> Cl<sup>-</sup>] (10 mmol) in CH<sub>3</sub>CN (5 mL) in 5 min by syringe under argon atmosphere. The mixture was allowed to stir at room temperature for 30 min, and then sonicated at room temperature for another 30 min.



It was then centrifuged (2000 rpm), and the supernatant was transferred under argon by syringe into a plastic bottle as a 0.2 M stock catalyst solution (microwave oven activated molecular sieves was preloaded to keep the solution dry).

## Synthesis of polymers

### Synthesis of polysulfonates

#### General procedure for the preparation of polysulfonates

The synthesis of poly-bisphenol-A-(2,2'-(phenylazanediy)bis(ethane-1-sulfonate) **PSFO3** was adapted as an example

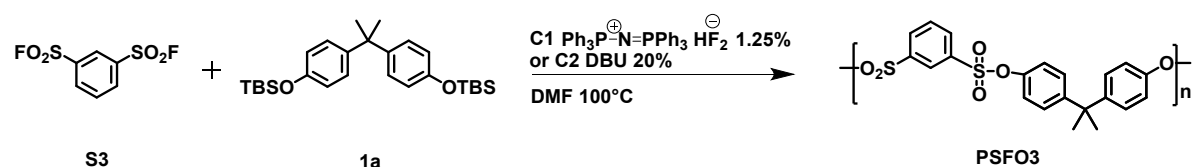

To an oven dried test tube with stir bar was added 2,2'-(phenylazanediy)bis(ethane-1-sulfonyl fluoride) (0.5 mmol) and bisphenol A bis(t-butyl dimethylsilyl) ether (0.5 mmol). The tube was purged three times with argon and then charged with DMF (0.1 mL) and The mixture was heated to 80 °C with stirring for 10 minutes under argon atmosphere, and then an additional (Ph<sub>3</sub>P=N-PPh<sub>3</sub>)<sup>+</sup>HF<sub>2</sub><sup>-</sup> (0.2 M in acetonitrile, 65 μL, 1.25 mol%) or 20% DBU was added to the reaction solution. The solution was added slowly by pipette into a flask containing methanol (50 mL) with vigorously stirring to precipitate the desired polysulfonate PSFO3. The precipitate was then isolated by filtration, washed with MeOH (20 mL), and dried under high vacuum pimp at 60 °C to provide 247 mg white solid. <sup>1</sup>H NMR (600 MHz, DMSO-*d*<sub>6</sub>) δ 8.33 – 8.15 (m, 2H), 7.93 (t, *J* = 7.9 Hz, 1H), 7.77 (s, 1H), 7.06 (d, *J* = 8.7 Hz, 4H), 6.84 (d, *J* = 8.7 Hz, 4H), 1.42 (s, 6H).

#### PSFO1

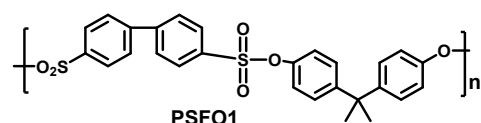

Prepared following the general procedure  $^1\text{H}$  NMR (600 MHz,  $\text{DMSO-}d_6$ )  $\delta$  8.03 – 7.84 (m, 8H), 7.13 (s, 4H), 6.94 (s, 4H), 1.51 (s, 6H).

#### PSFO2

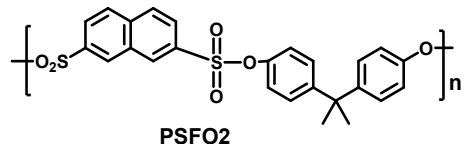

Prepared following the general procedure  $^1\text{H}$  NMR (600 MHz,  $\text{DMSO-}d_6$ )  $\delta$  8.94 – 8.80 (m, 2H), 8.40 – 8.25 (m, 2H), 8.13 – 8.01 (m, 2H), 7.11 – 6.99 (m, 4H), 7.00 – 6.82 (m, 4H), 1.44 (dt,  $J = 14.8, 4.6$  Hz, 6H).

#### PSFO4

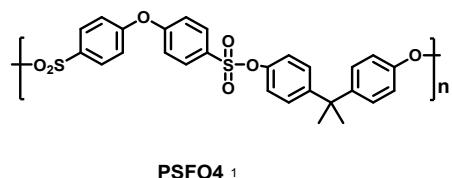

Prepared following the general procedure  $^1\text{H}$  NMR (600 MHz,  $\text{DMSO-}d_6$ )  $\delta$  7.86 (d,  $J = 8.4$  Hz, 4H), 7.38 (dd,  $J = 113.5, 8.3$  Hz, 4H), 7.12 (dd,  $J = 30.3, 8.6$  Hz, 4H), 6.97 (dd,  $J = 61.6, 8.5$  Hz, 4H), 1.53 (s, 6H).

#### PSFO1-TPP

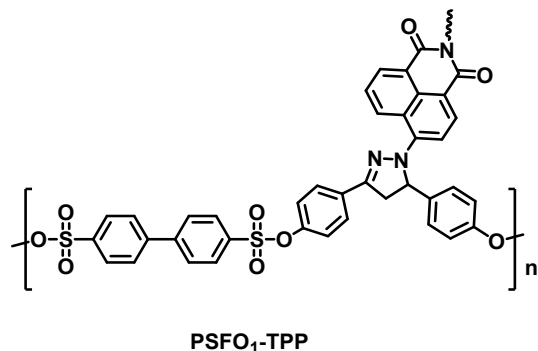

Prepared following the general procedure  $^1\text{H}$  NMR (400 MHz,  $\text{DMSO-}d_6$ )  $\delta$  9.62 – 9.15 (m, 1H), 8.34 – 7.98 (m, 3H), 7.94 – 7.65 (m, 8H), 7.57 (t,  $J = 10.4$  Hz, 3H), 7.46 – 7.25 (m, 2H), 7.13 (s, 2H), 6.97 (s, 2H), 5.88 (s, 1H), 3.85 (s, 3H), 3.27 – 3.03 (m, 1H), 1.43 (s, 2H), 1.20 (d,  $J = 19.0$  Hz, 3H), 0.96 – 0.55 (m, 4H).

## Synthesis of polysulfates

### General procedure for the preparation of polysulfates

The synthesis of Poly-bisphenol-A-(2,2'-(phenylazanediy)bis(ethane-1-sulfonate) PSFA3 was adapted as an example

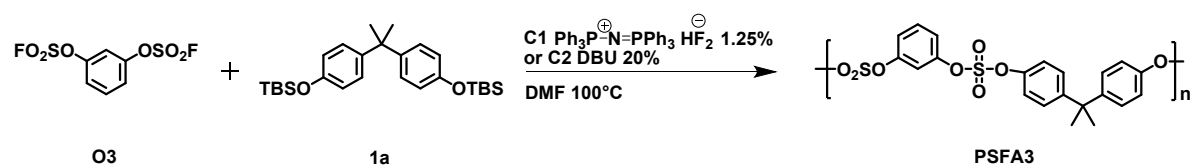

To an oven dried test tube with stir bar was added 2,2'-(phenylazanediy)bis(ethane-1-sulfonyl fluoride) (0.5 mmol) and bisphenol A bis(t-butyl dimethylsilyl) ether (0.5 mmol). The tube was purged three times with argon and then charged with DMF (0.1 mL). The mixture was heated to 80°C with stirring for 10 minutes under argon atmosphere, and then an additional  $(\text{Ph}_3\text{P}=\text{N}-\text{PPh}_3)^+\text{HF}_2^-$  (0.2 M in acetonitrile, 65  $\mu\text{L}$ , 1.25 mol%) was added to the reaction solution. The solution was added slowly by pipette into a flask containing methanol (50 mL) with vigorously stirring to precipitate the desired polysulfonate PSFA3. The precipitate was then isolated by filtration, washed with MeOH (20 mL), and dried under high vacuum pump at 60°C to provide 247 mg white solid.

**PSFA1** prepared following the procedure  $^1\text{H NMR}$  (600 MHz,  $\text{DMSO}-d_6$ )  $\delta$  7.93 – 7.72 (m, 4H), 7.48 (d,  $J = 7.9$  Hz, 4H), 7.34 (s, 8H), 1.62 (s, 6H).

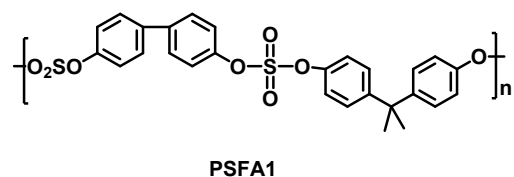

**PSFA2** prepared following the procedure  $^1\text{H NMR}$  (600 MHz,  $\text{DMSO}-d_6$ )  $\delta$  8.18 (d,  $J = 38.6$  Hz, 4H), 7.58 (s, 2H), 7.35 (d,  $J = 30.2$  Hz, 8H), 1.59 (s, 6H).

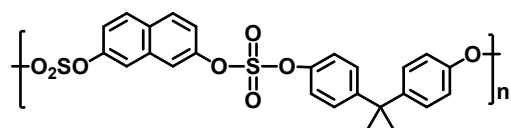

**PSFA2**

**PSFA4** prepared following the procedure  $^1\text{H NMR}$  (600 MHz,  $\text{DMSO-}d_6$ )  $\delta$  7.43 (s, 4H), 7.32 (s, 8H), 7.13 (d,  $J = 8.9$  Hz, 4H), 1.61 (s, 6H).

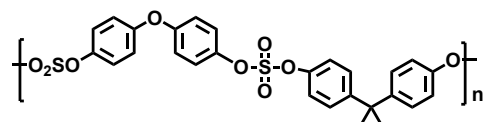

**PSFA4**

**PSFA1-TPP** prepared following the procedure

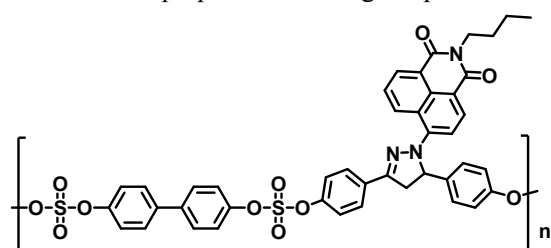

**PSFA1-TPP**

| □            | Polysulfates | T    | C1    |     | C2    |     | Td  |
|--------------|--------------|------|-------|-----|-------|-----|-----|
|              |              |      | Mn    | PDI | Mn    | PDI |     |
| <b>PSFA1</b> |              | RT   | 23800 | 1.5 | 17600 | 1.5 | -   |
|              |              | 373K | 38600 | 1.5 | 33700 | 1.5 | 336 |
| <b>PSFA2</b> |              | 373K | 21900 | 1.3 | 25000 | 1.5 | 353 |
| <b>PSFA3</b> |              | 373K | 17100 | 1.4 | 20800 | 1.4 | 353 |
| <b>PSFA4</b> |              | 373K | 46300 | 1.5 | 56000 | 1.5 | 339 |

**Table S1: The reaction conditions and GPC results of Polysulfates**

**Table S2: Degradation behavior of PSFO1 in different organic bases or solvent**

| □      | Base solution                   |            |            |            | □      | Solvent (DBU) |                                 |            |
|--------|---------------------------------|------------|------------|------------|--------|---------------|---------------------------------|------------|
|        | Na <sub>2</sub> CO <sub>3</sub> | TMA        | Py         | DMAP       |        | THF           | CH <sub>2</sub> Cl <sub>2</sub> | DMF        |
| before | 73600(1.5)                      | 73900(1.5) | 73900(1.5) | 73900(1.5) | before | 35600(1.6)    | 35600(1.6)                      | 35600(1.6) |
| after  | 72000(1.6)                      | 71100(1.7) | 69800(1.7) | 61400(1.8) | after  | 13400(1.3)    | 10600(1.2)                      | 9000(1.2)  |

**Table S3: Degradation behavior of PSFO1 in different amounts of catalyst**

| □      | 5%         | 10%        | 20%        | 30%        |
|--------|------------|------------|------------|------------|
| before | 35600(1.6) | 35600(1.6) | 35600(1.6) | 35600(1.6) |
| after  | 11300(1.1) | 10100(1.1) | 10800(1.1) | 10100(1.1) |

**Figure S1: Plot of the molecular weight (Mn ps) of PSFA1 and PSFO1 vs reaction time at**

**100°C**

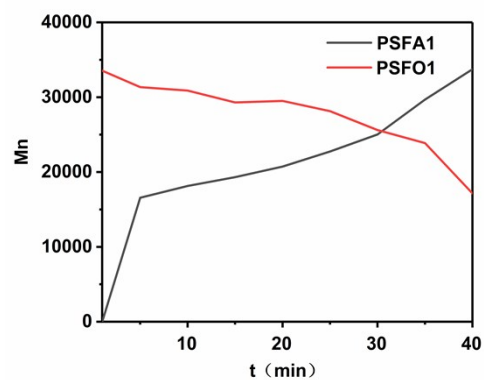

**Figure S2: LC-MS analysis of the reaction**

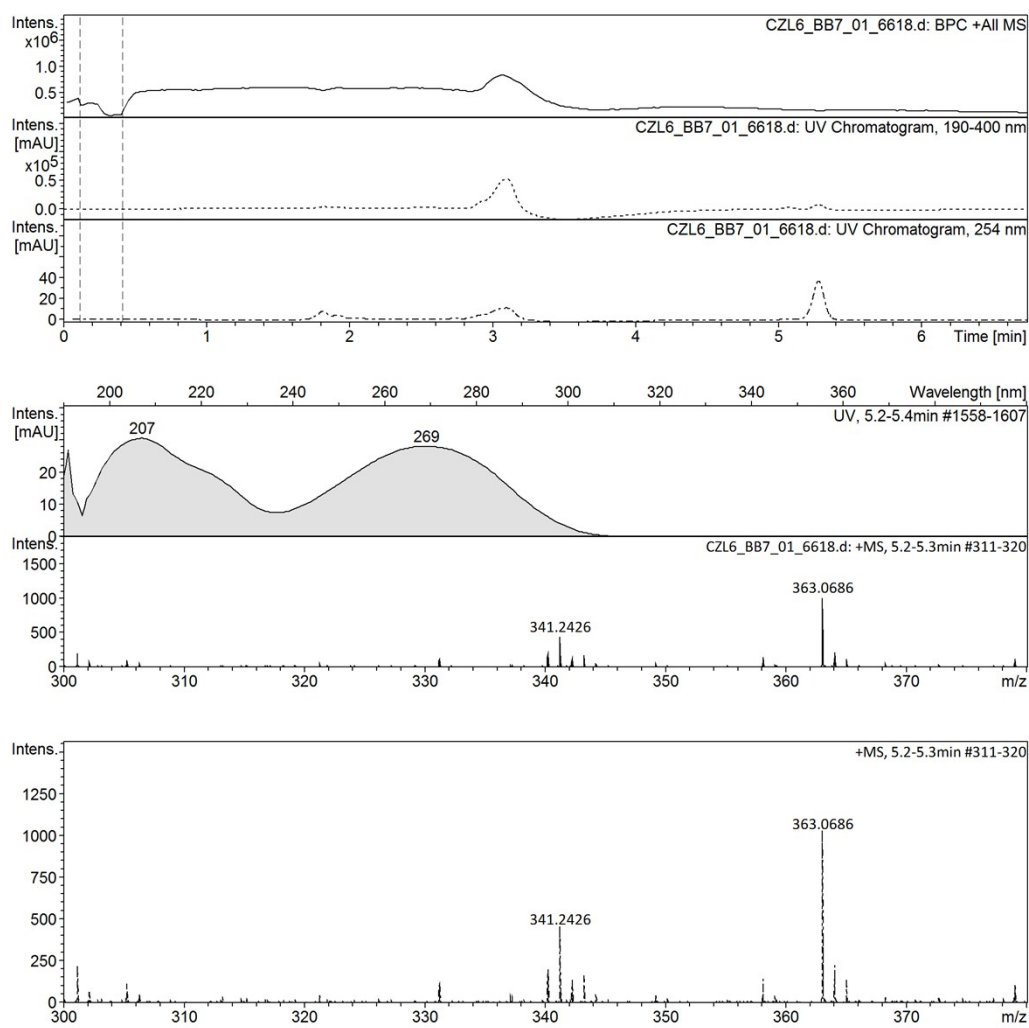

**Figure S3: <sup>1</sup>HNMR spectra of PSFO2-TPE**

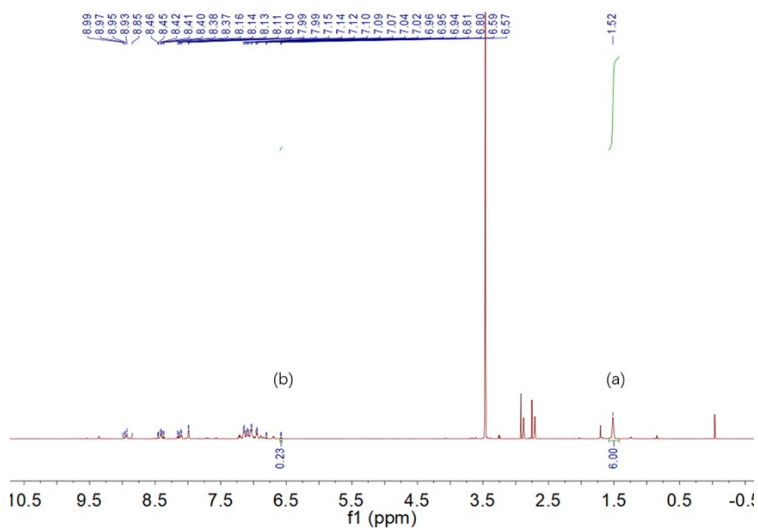

**Table S3: The molecular weight (Mn ps) of PSFO1 use 3 catalysts vs reaction time at 100°C**

| Catalysts | TBD   | MTBD  | TMG   |
|-----------|-------|-------|-------|
| 5min      | 29759 | 51559 | 52066 |
| 15min     | 25961 | 48451 | 50193 |
| 30min     | 24766 | 44350 | 51007 |
| 45min     | 22387 | 42315 | 51218 |
| 65min     | 20244 | 35154 | 47853 |
| 85min     | 18563 | 29375 | 43885 |
| 105min    | 18165 | 27140 | 43452 |
| 125min    | 18187 | 26805 | 42771 |

Figure S4: Plot of the molecular weight (Mn ps) of PSFO1 use 3 catalysts vs reaction time at

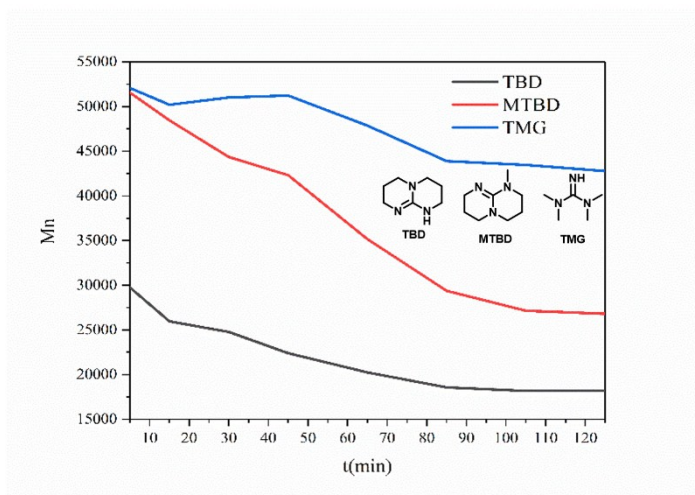

100°C



**Figure S5. IR spectra of PSFO2 and PSFO2-OTBS; TPE-OTBS**

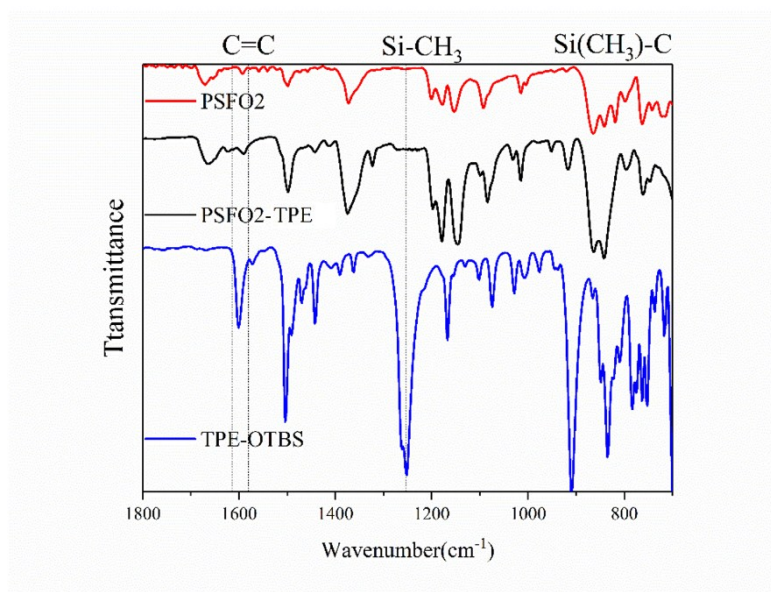

**Figure S6: MALDI-TOF mass spectrum of the polymer PSFO1 treated with DBU.**

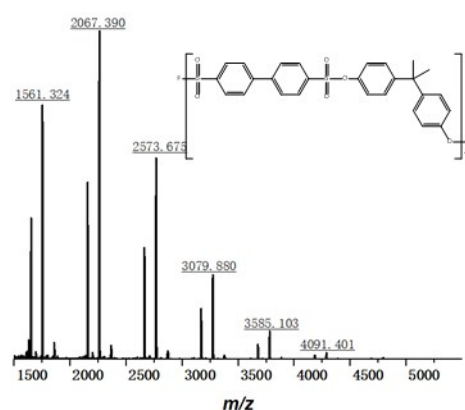

End-Group Analysis by MALDI-TOF MS. We conduct the end-group analysis using formula :  $P_m = E_m + C_m + nRU_m$ . where  $E_m$  represents the end group mass,  $P_m$  is the chosen polymer peak mass,  $C_m$  is the cation ion mass,  $n$  is the RU number, and  $RU_m$  represents the mass of the RU. In Positive mode,  $-\text{SO}_3\text{H}$  was calculated as  $-\text{SO}_3\text{Na}^+$ , Thus,  $P_m = E_m + C_m + nRU_m = 1 + 19 + 23 + 4X$   $506 = 2067$ , which is composed of  $-\text{SO}_3\text{H}$  and  $-\text{OH}$  end groups. The peak mass of 2067.390 Da in Figure was in good agreement with the expected molecular weight.

**Figure S7: FTIR spectra of polymer PSFO1 treating by DBU.**

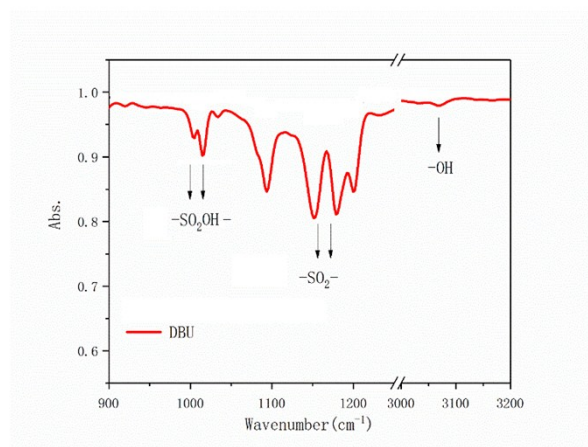

### **Preparation of PSFO1-OCH<sub>3</sub>**

The prepared PSFO1 polymer(200mg) was placed in a 5 ml round bottom flask equipped with a magnetic stirrer, and DMF (1ml)was added,and heat to completely dissolve it. Then, DBU and tert-butyl(4-methoxyphenoxy)dimethylsilane(200mg) were separately added and then heated to 100 °C for 6 hours. The entire reaction is carried out in a constant stream of N<sub>2</sub> . After the end of the reaction, the reactor was naturally cooled to room temperature, which was precipitated into MeOH to precipitate a polymer. The obtained solution was centrifuged at 8000 rpm for 10 minutes twice to wash away impurities. The precipitate was filtered and washed three times with MeOH, suction filtered, and then dried in vacuo in an oven at 60 ° C for 6 hours. The blocked product was obtained. After the reaction is completed, it is then dialyzed in a dialysis bag to remove small molecules. The solid was obtained from the solution by freeze drying and vacuum-baked in an oven at 60 ° C for 6 hours. A white solid was obtained. (Yield: about 25%).

### **Preparation of PSFO2-TPE**

The prepared PSFO2 polymer(200mg) was placed in a 5 ml round bottom flask equipped with a

magnetic stirrer, and DMF (2ml) was added, and heat to completely dissolve it. Then, DBU(20%) and TPE-OTBS(200mg) were separately added and then heated to 100 °C for 6 hours. The entire reaction is carried out in a constant stream of N<sub>2</sub>. After the end of the reaction, the reactor was naturally cooled to room temperature, which was precipitated into MeOH to precipitate a polymer. The obtained solution was centrifuged at 8000 rpm for 10 minutes twice to wash away impurities. The precipitate was filtered and washed three times with MeOH, suction filtered, and then dried in vacuo in an oven at 60 °C for 6 hours. The blocked product was obtained. After the reaction is completed, it is then dialyzed in a dialysis bag to remove small molecules. The solid was obtained from the solution by freeze drying and vacuum-baked in an oven at 60 °C for 6 hours. A white solid was obtained. (Yield: about 20%).

### **Preparation of PSFO1-TPP-CF<sub>3</sub>**

The prepared PSFO1-TPP polymer(50mg) was placed in a 5 ml round bottom flask equipped with a magnetic stirrer, and DMF (1ml) was added, and heat to completely dissolve it. Then, DBU (20%) and MTPP-OTBS(80mg) were separately added and then heated to 100 °C for 6 hours. The entire reaction is carried out in a constant stream of N<sub>2</sub>. After the end of the reaction, the reactor was naturally cooled to room temperature, which was precipitated into MeOH to precipitate a polymer. The obtained solution was centrifuged at 8000 rpm for 10 minutes twice to wash away impurities. The precipitate was filtered and washed three times with MeOH, suction filtered, and then dried in vacuo in an oven at 60 °C for 6 hours. The blocked product was obtained. After the reaction is completed, it is then dialyzed in a dialysis bag to remove small molecules. The solid was obtained from the solution by freeze drying and vacuum-baked in an oven at 60 °C for 6 hours. A white solid was obtained. (Yield: about 18%).

## **Copies of the NMR spectra**

### **<sup>1</sup>H NMR (S-1)**

8.25  
8.23  
7.95  
7.93

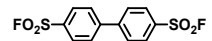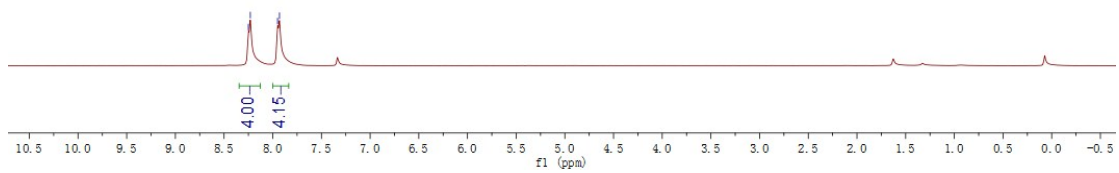

**<sup>13</sup>C NMR (S-1)**

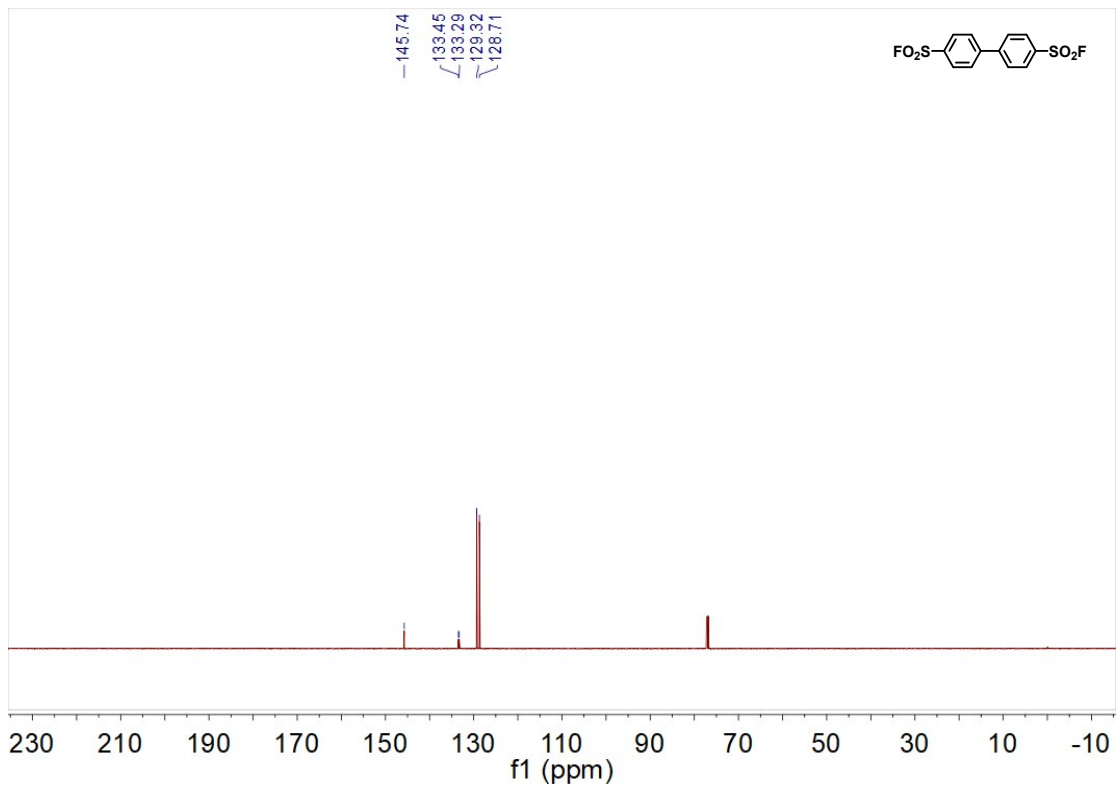

**<sup>19</sup>F NMR (S-1)**

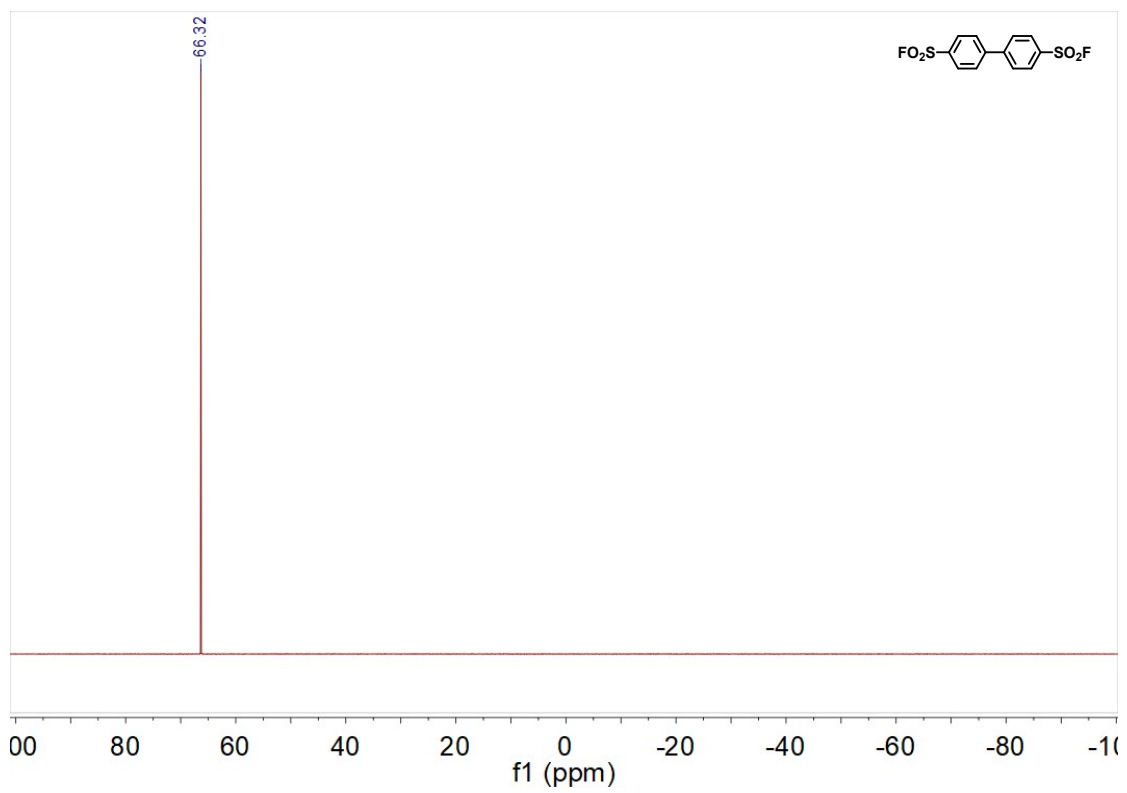

**<sup>1</sup>H NMR (S-2)**

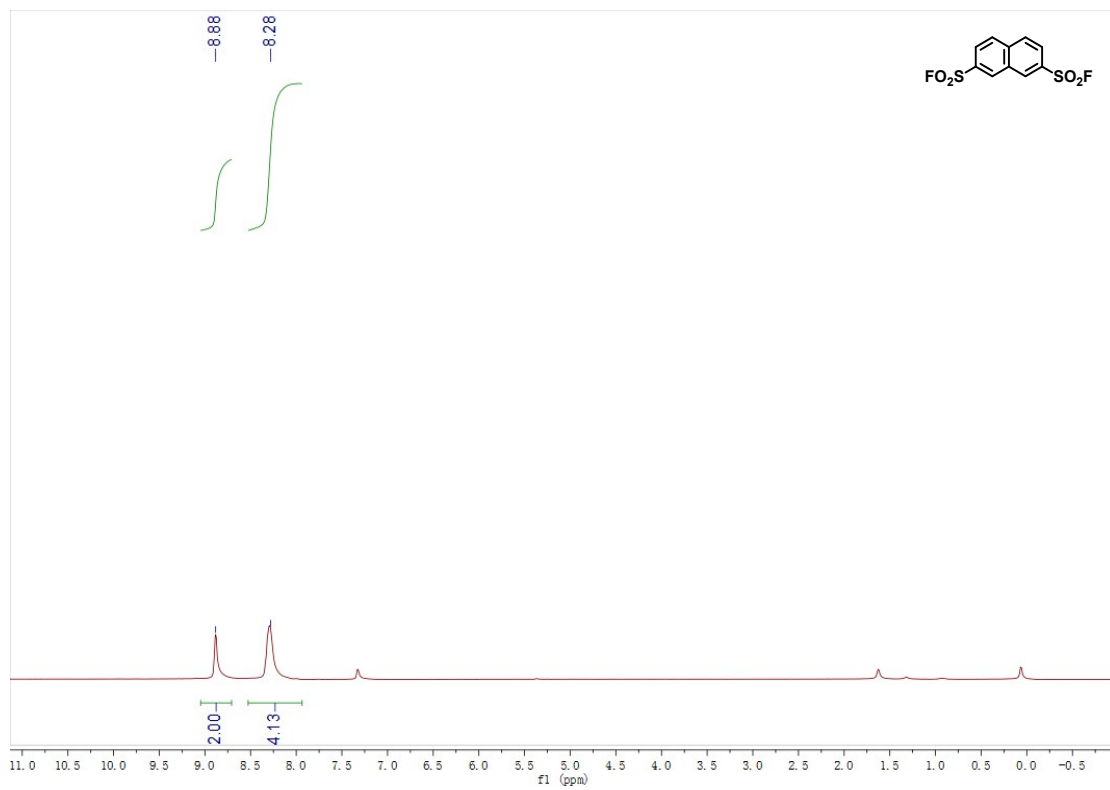

**<sup>13</sup>C NMR (S-2)**

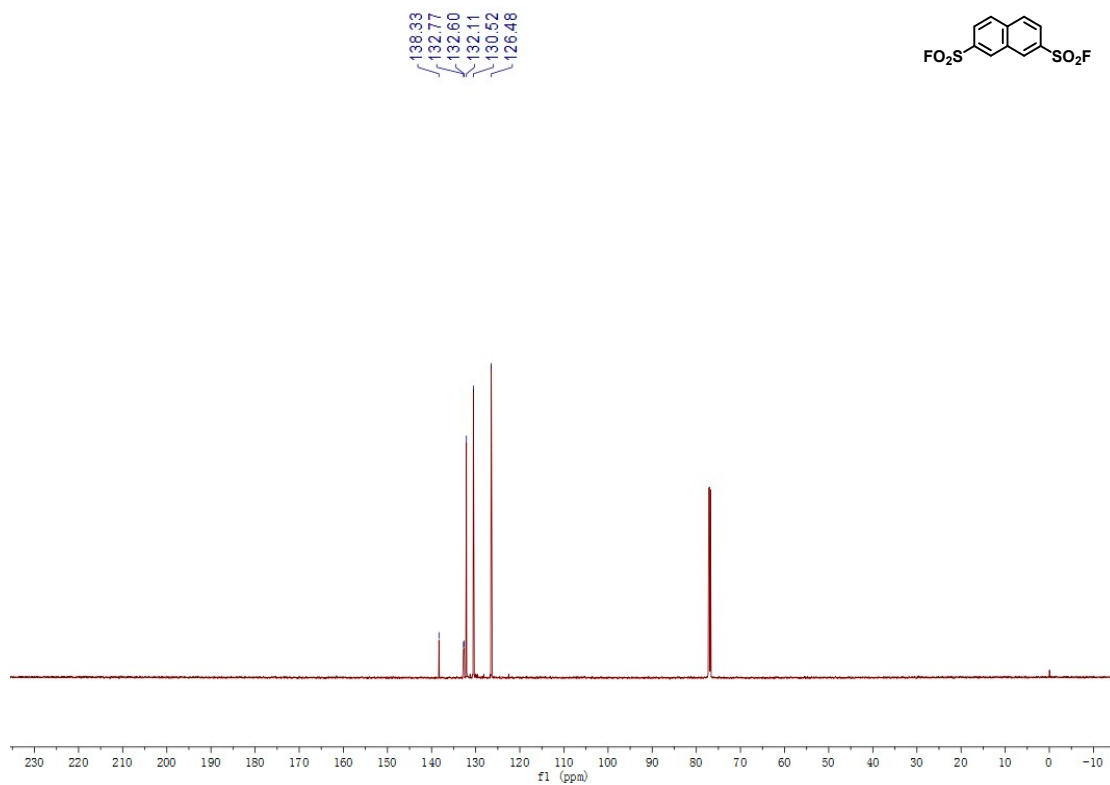

**<sup>19</sup>F NMR (S-2)**

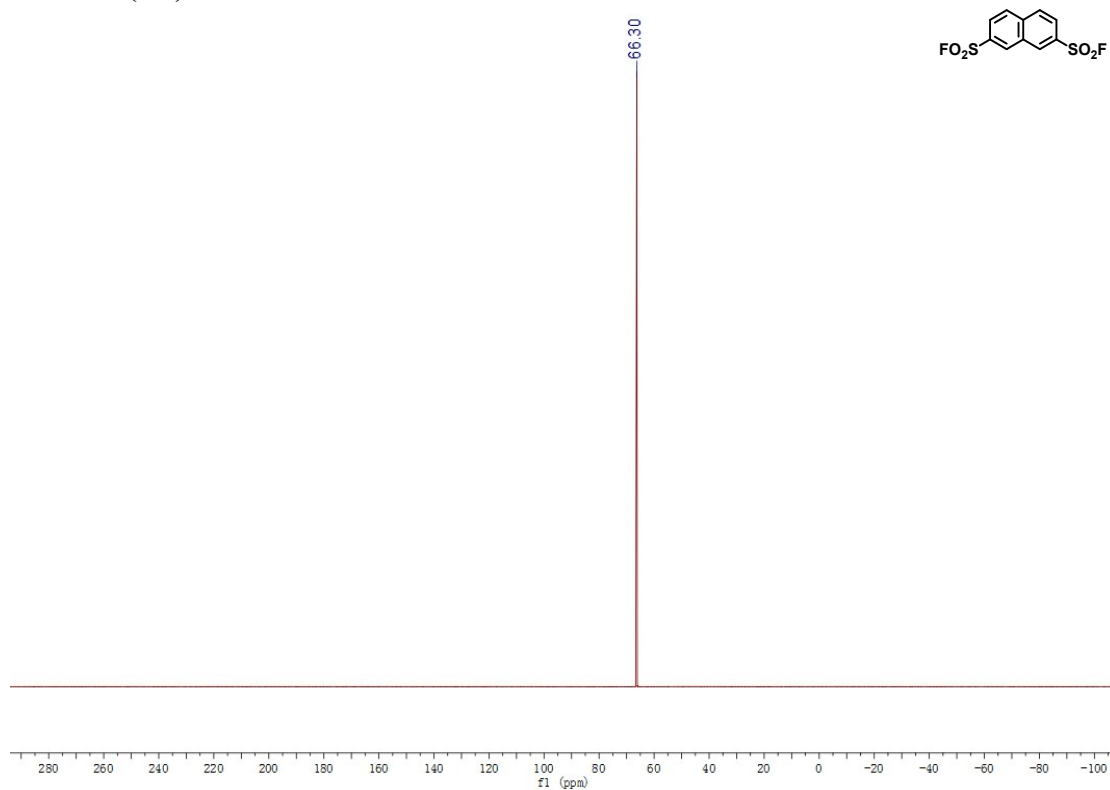

**<sup>1</sup>H NMR (S-3)**

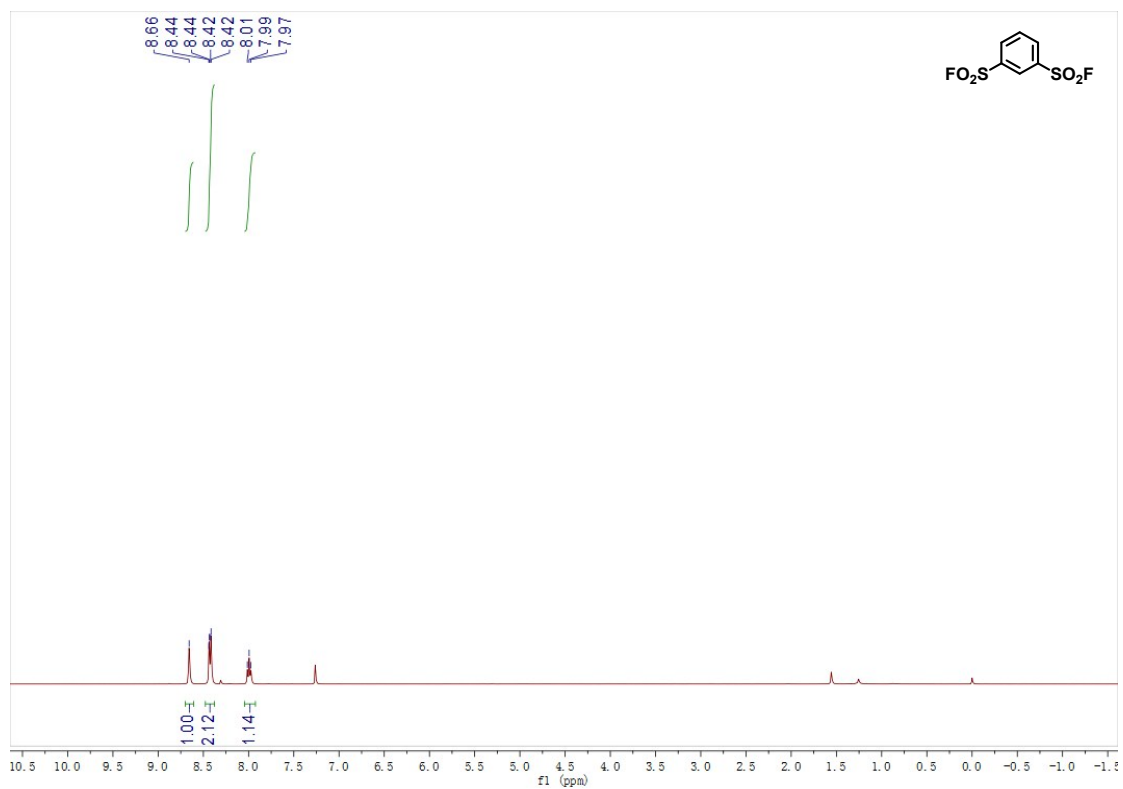

**<sup>13</sup>C NMR (S-3)**

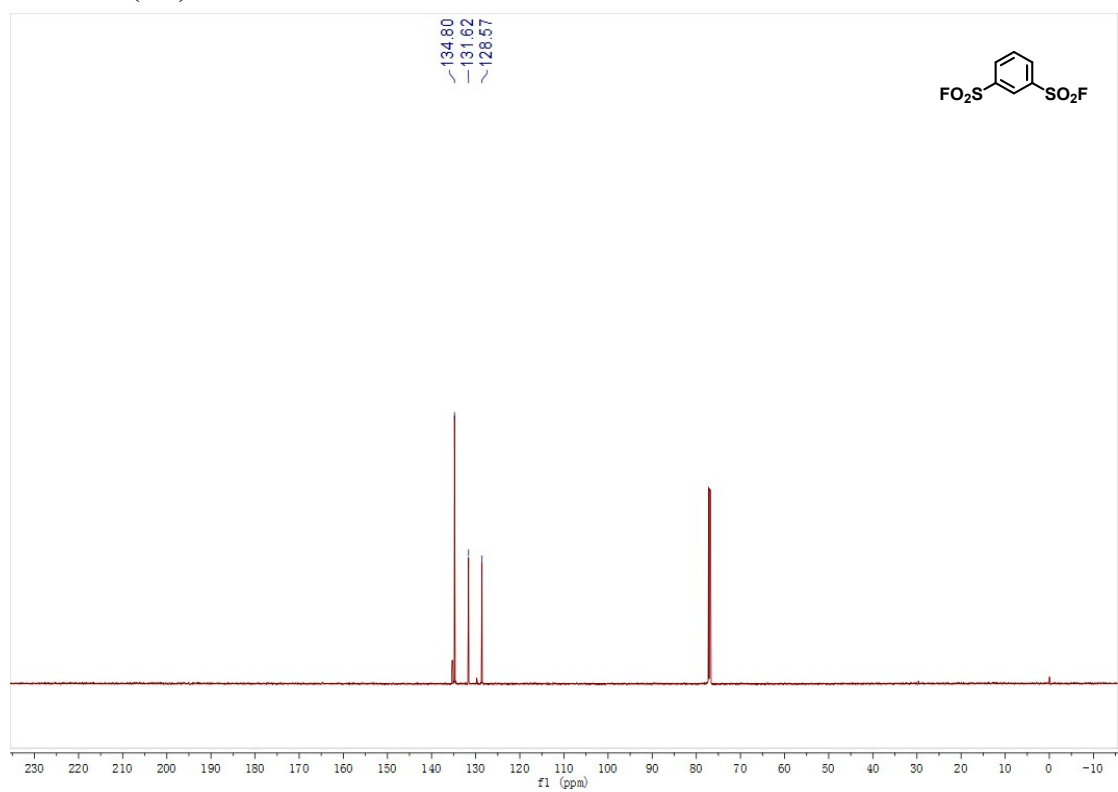

**<sup>19</sup>F NMR (S-3)**

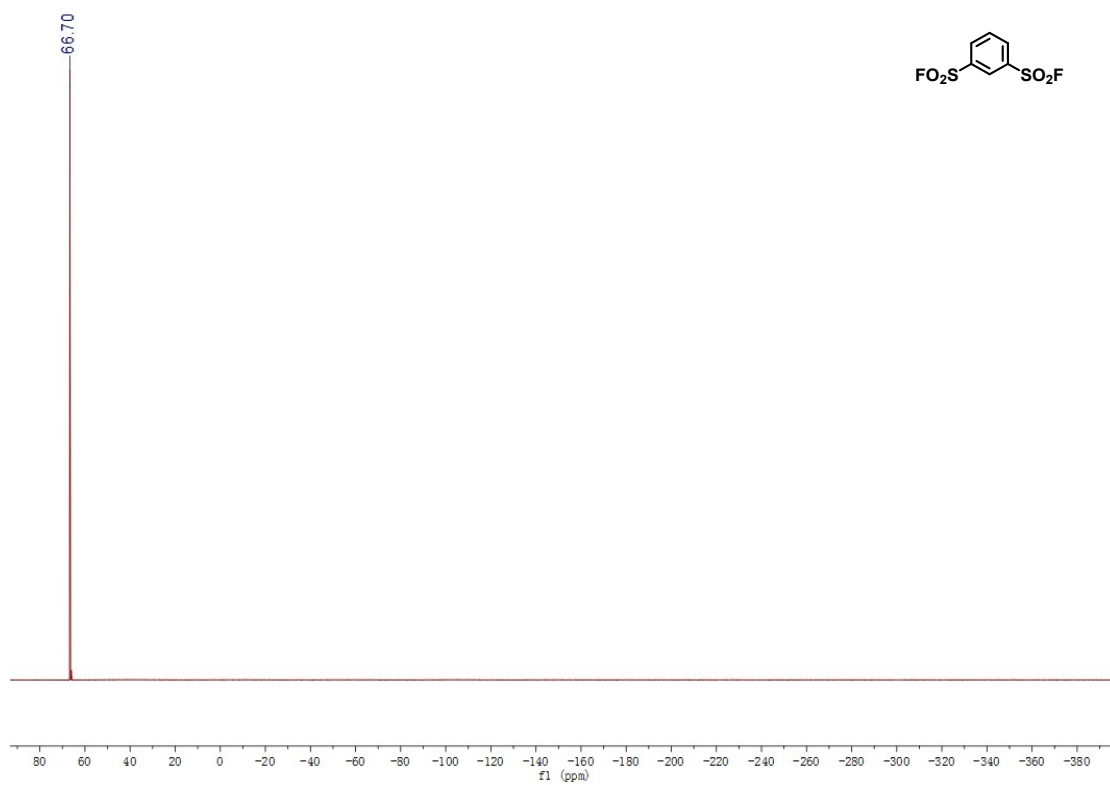

**<sup>1</sup>H NMR (S-4)**

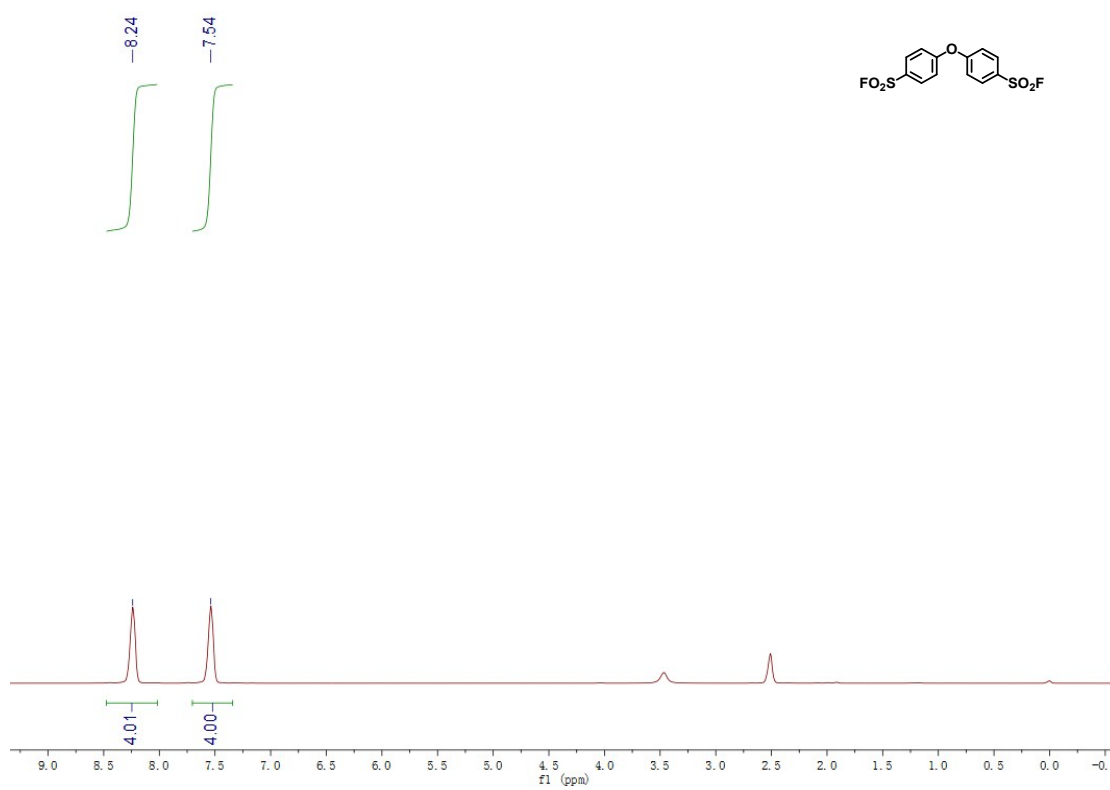

**<sup>13</sup>C NMR (S-4)**



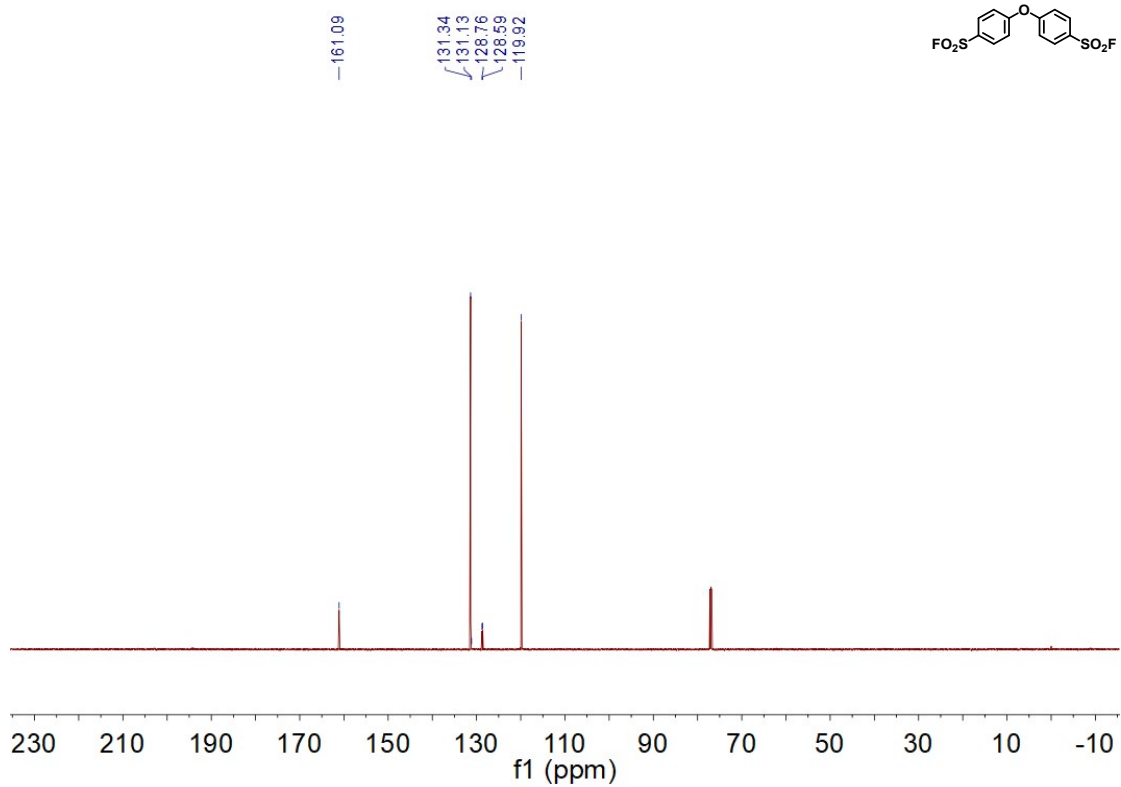

**<sup>13</sup>C NMR (S-4)**

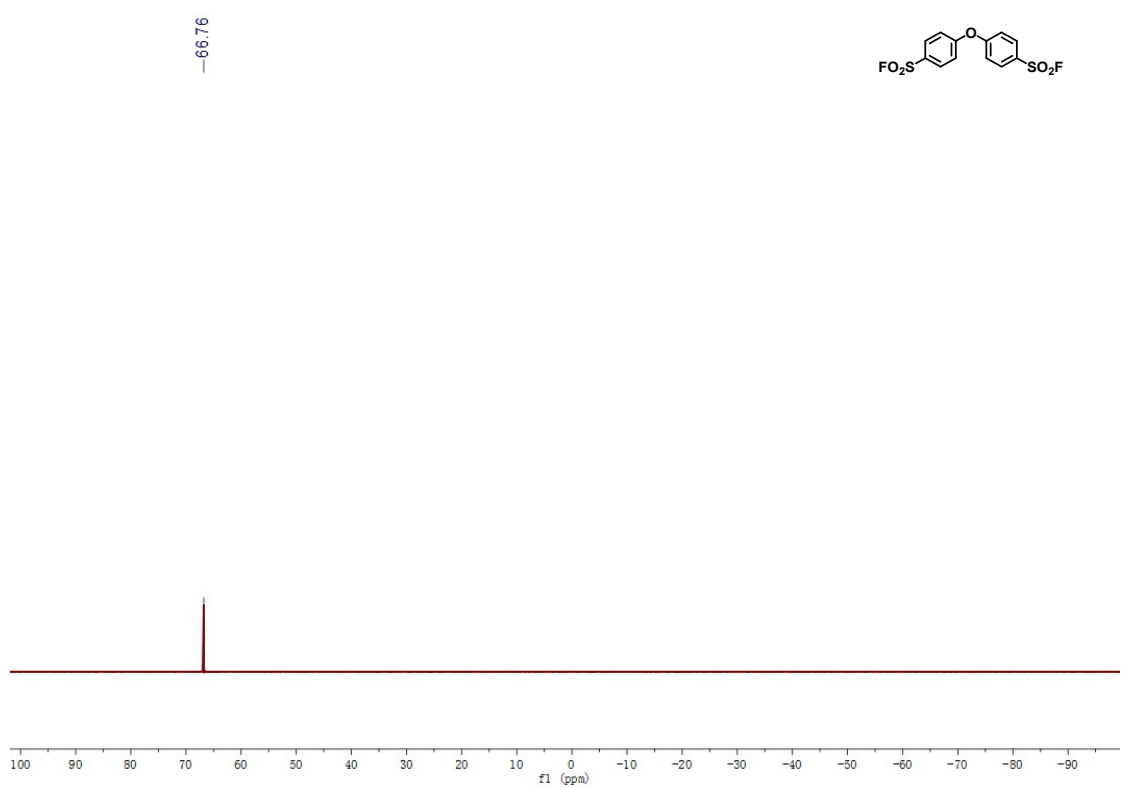

**<sup>1</sup>H NMR (O-1)**

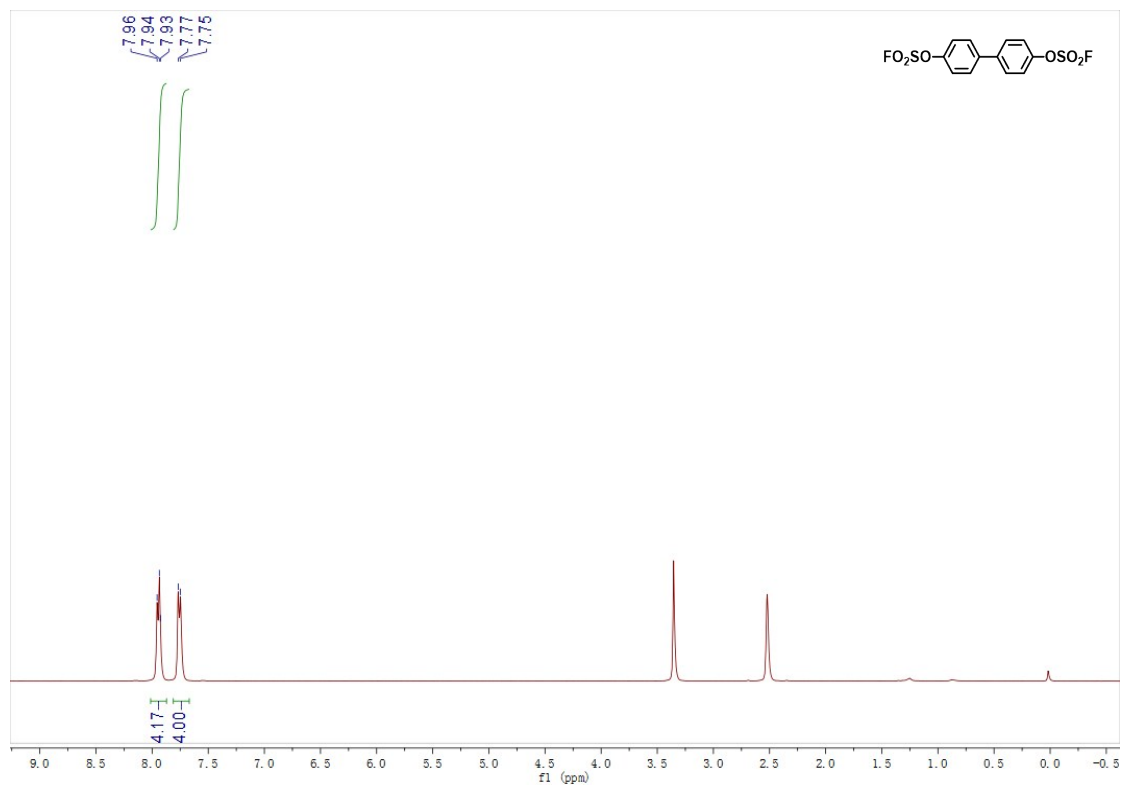

**<sup>13</sup>C NMR (O-1)**

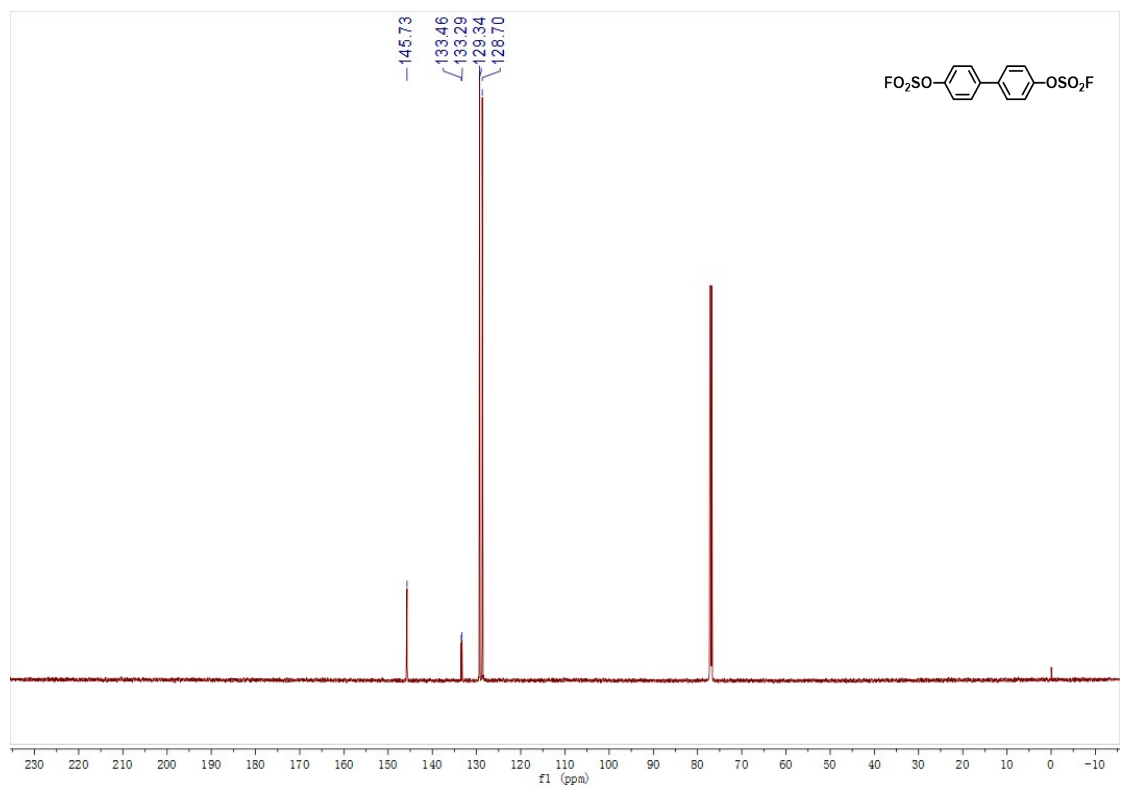

**<sup>19</sup>F NMR (O-1)**

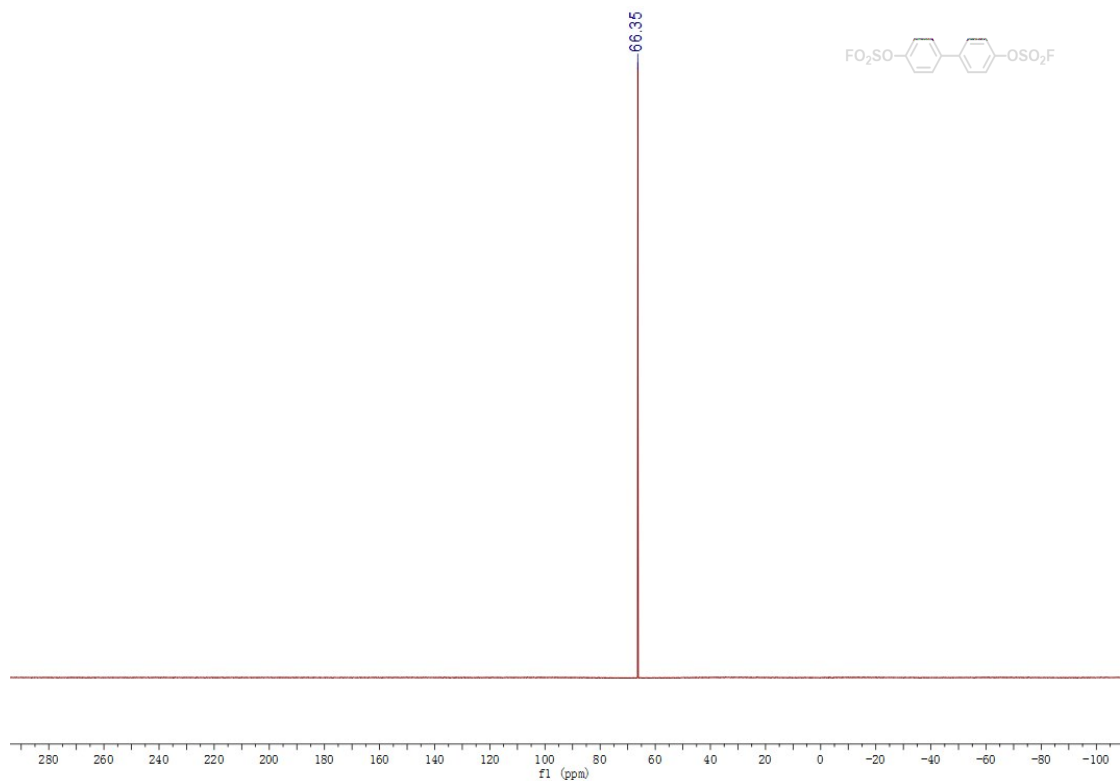

**$^1\text{H}$  NMR (O-2)**

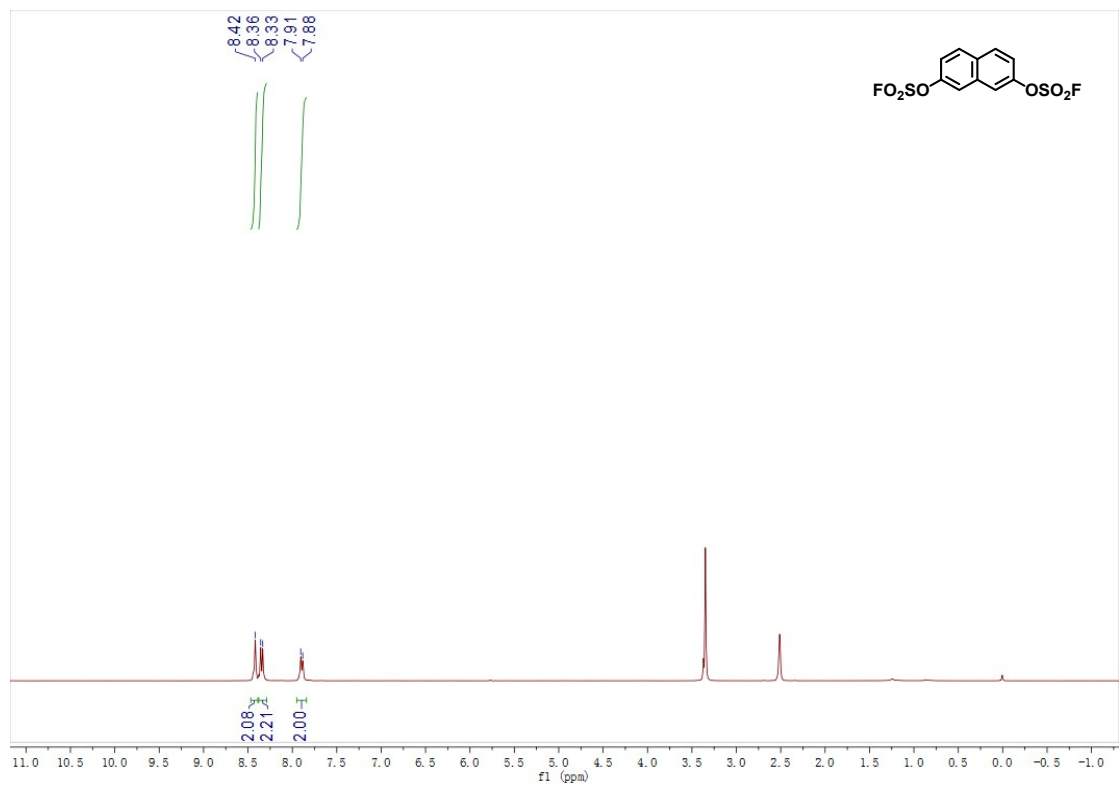

**$^{13}\text{C}$  NMR (O-2)**

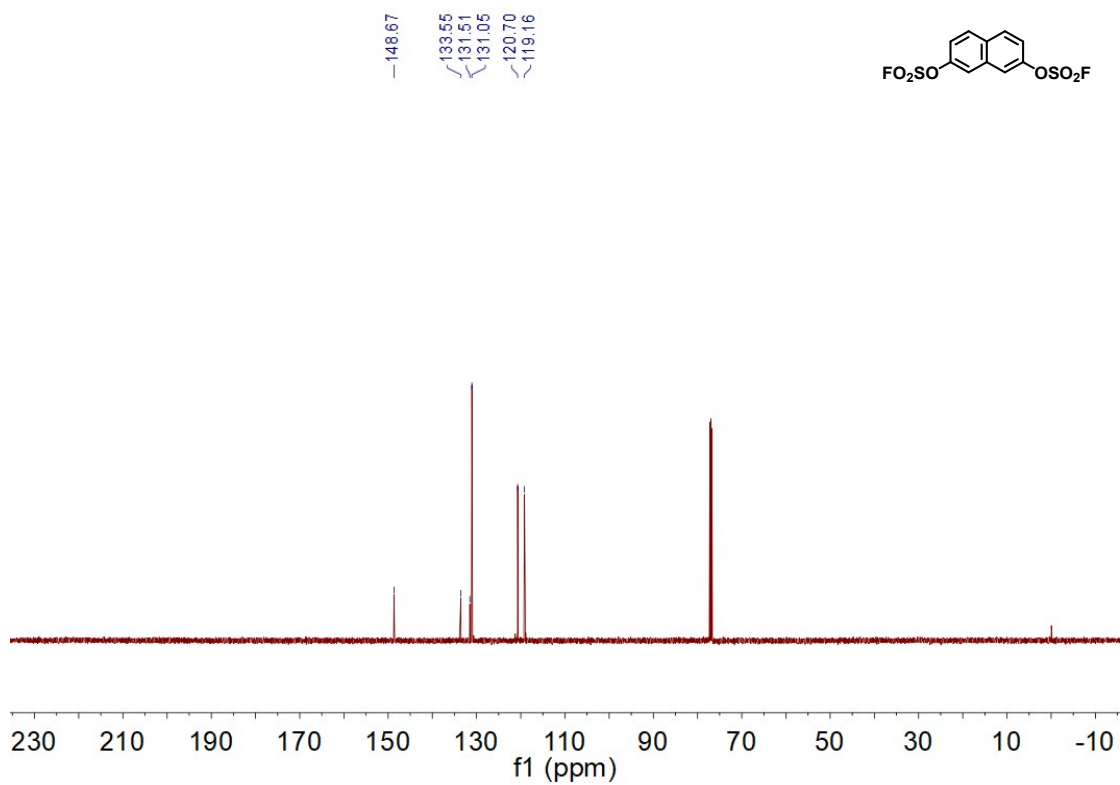

<sup>19</sup>F NMR (O-2)

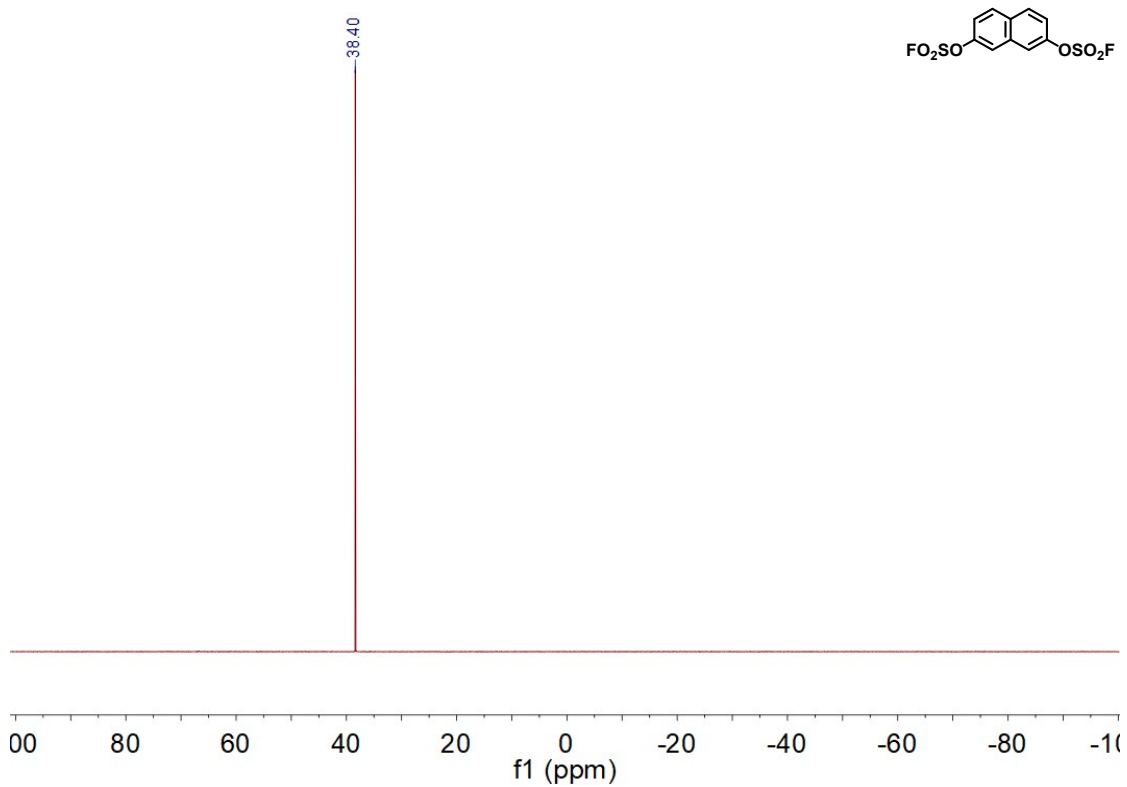

<sup>1</sup>H NMR (O-3)

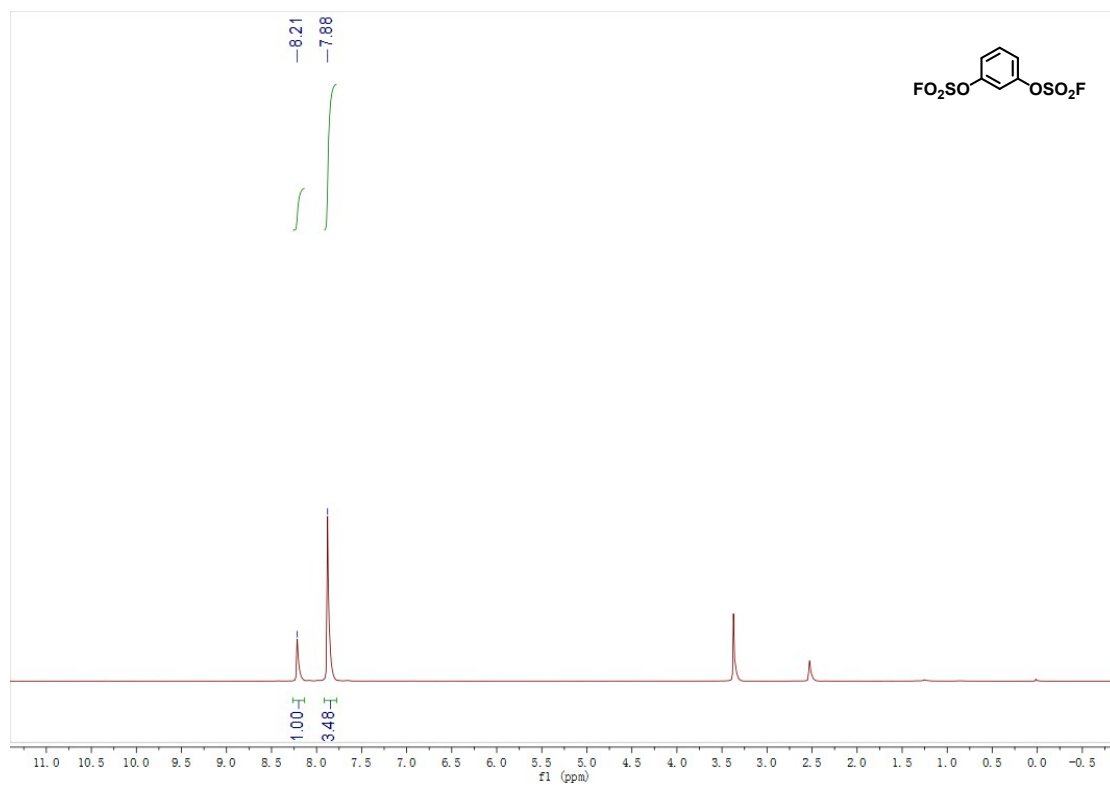

**<sup>13</sup>C NMR (O-3)**

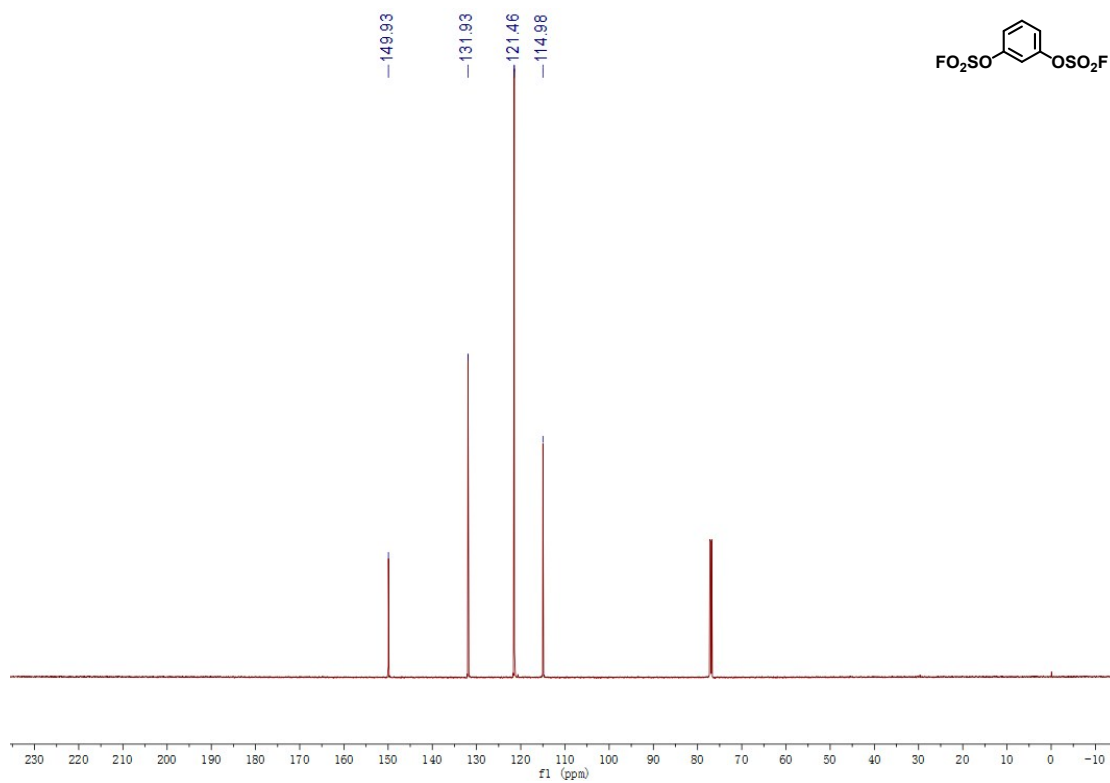

**<sup>19</sup>F NMR (O-3)**

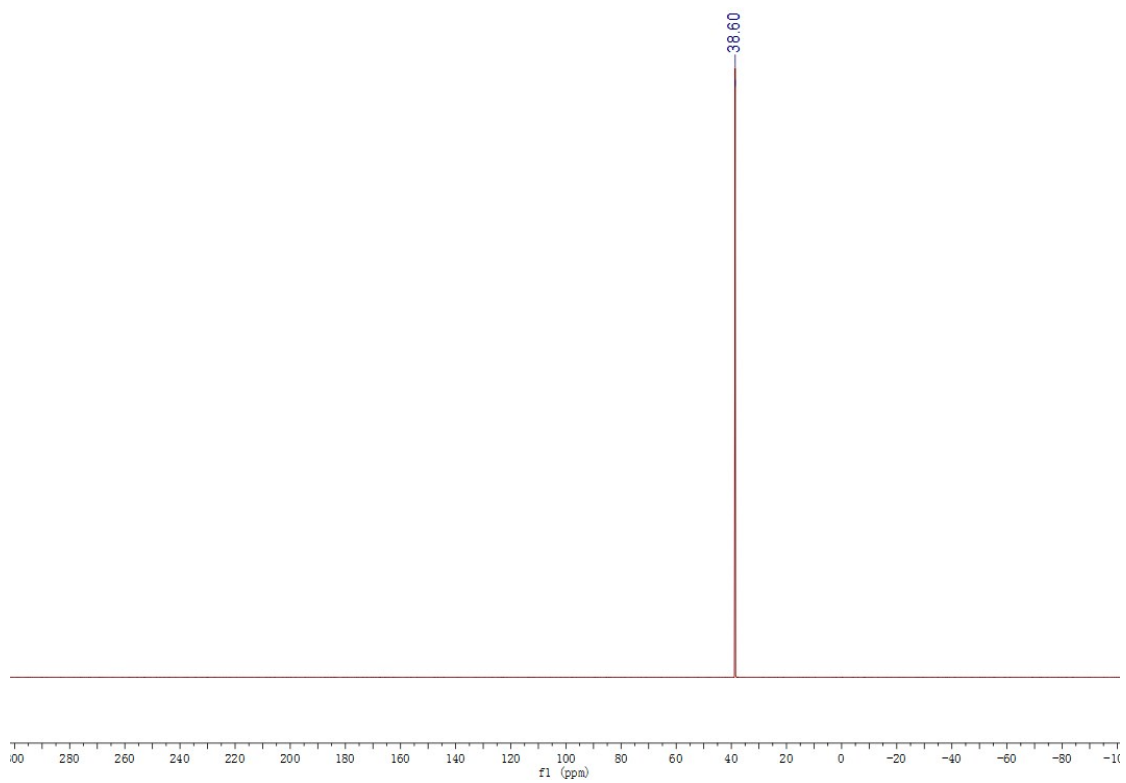

**$^1\text{H}$  NMR (O-4)**

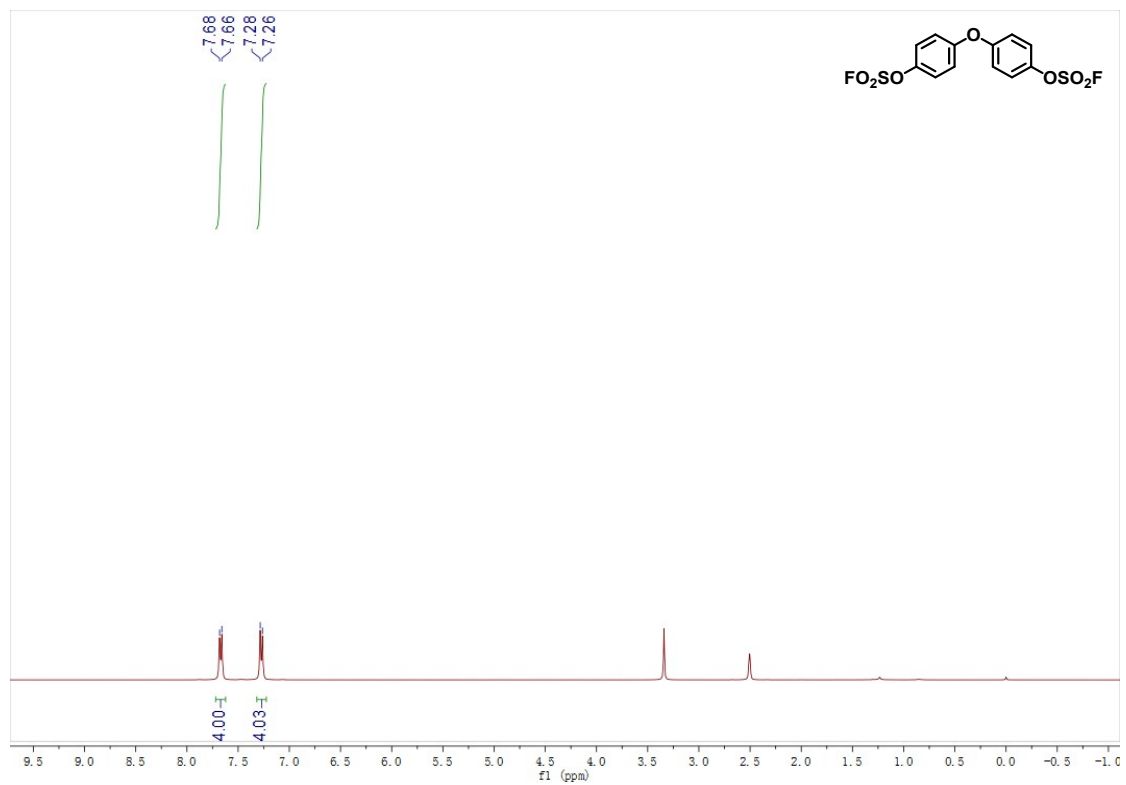

**$^{13}\text{C}$  NMR (O-4)**

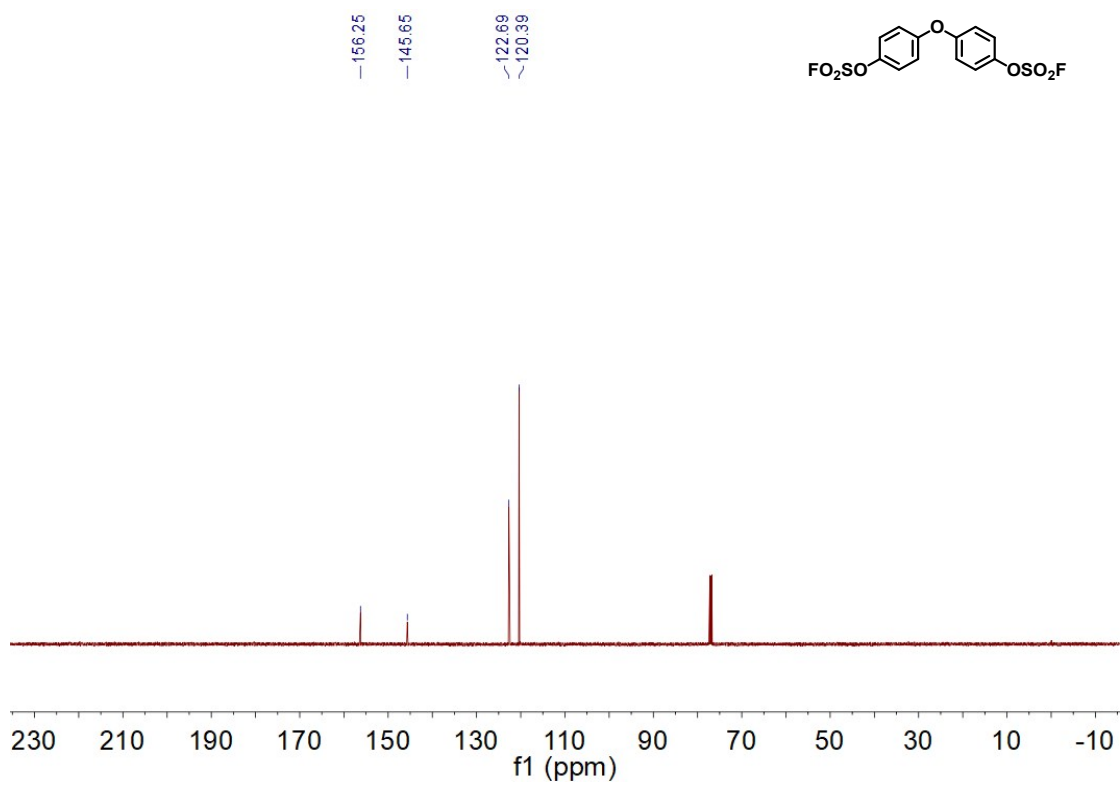

<sup>19</sup>F NMR (O-4)

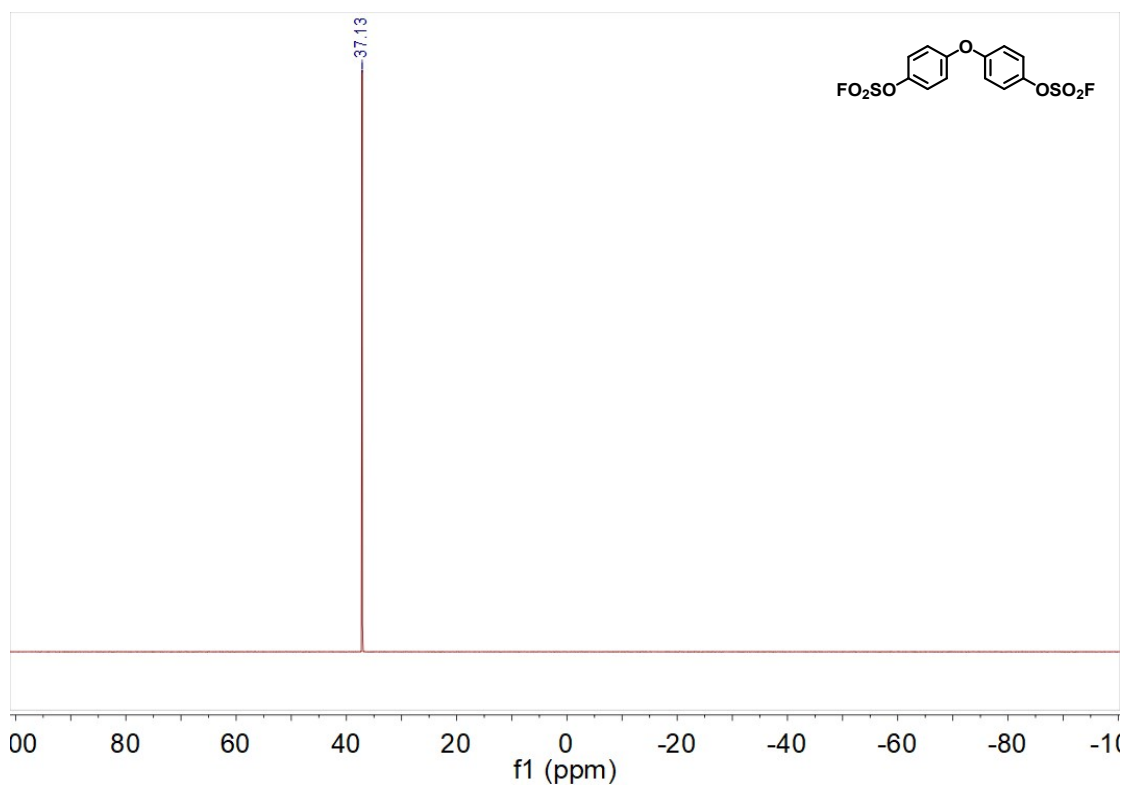

<sup>1</sup>H NMR (1a)

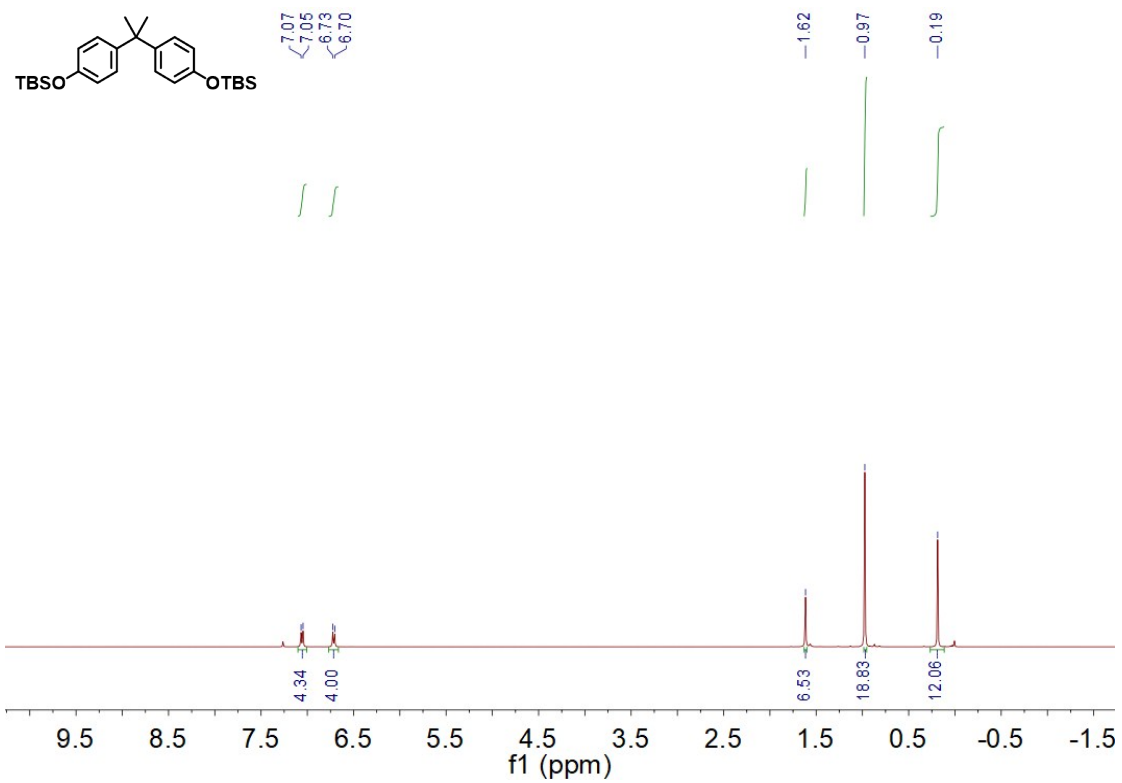

**<sup>13</sup>C NMR(1a)**

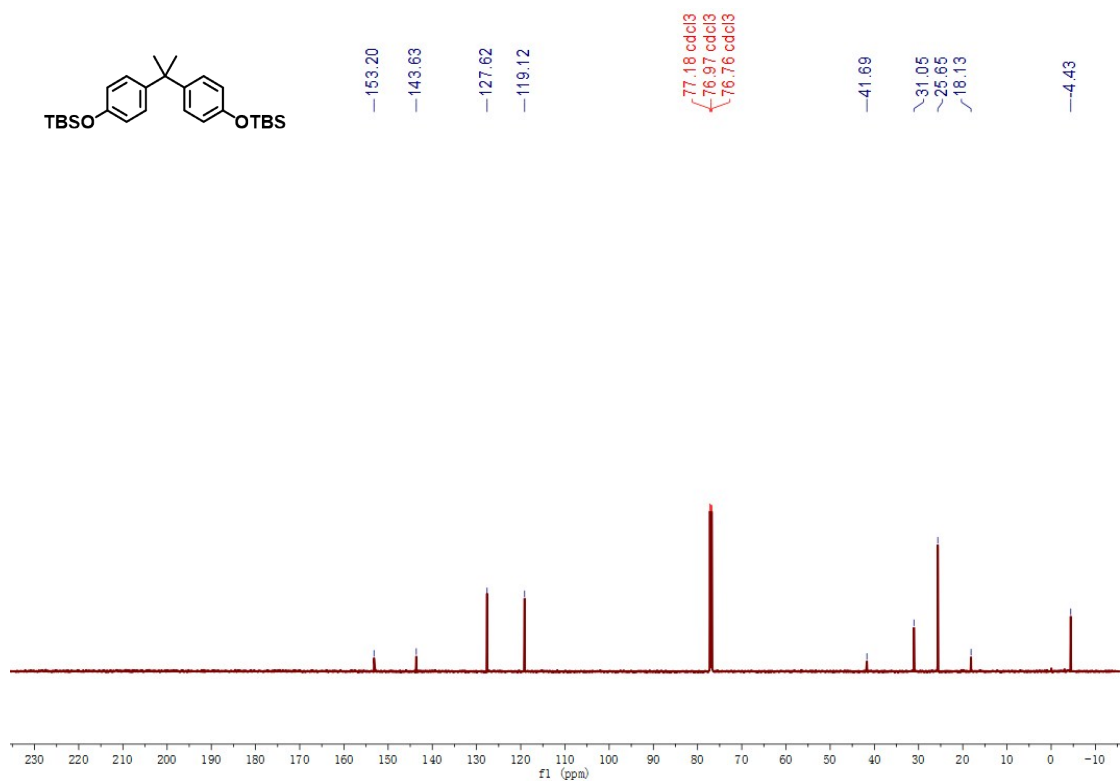

**<sup>1</sup>H NMR (1b)**



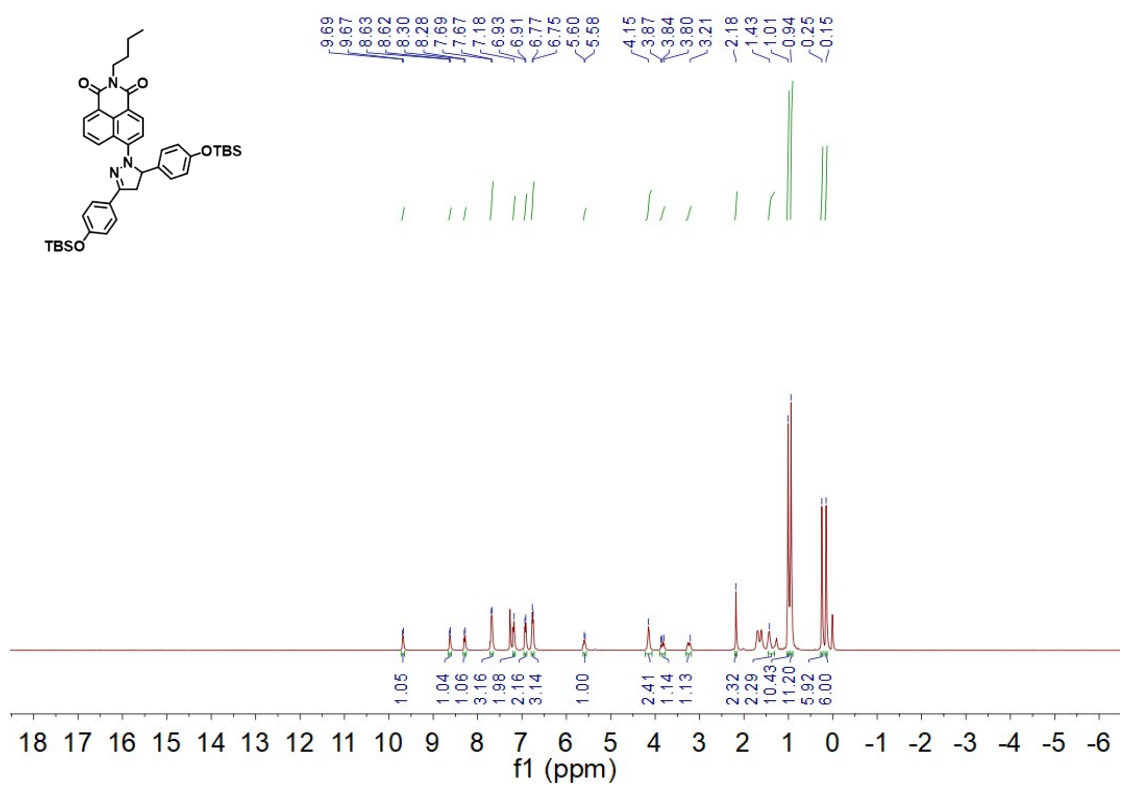

**<sup>1</sup>H NMR (1c)**

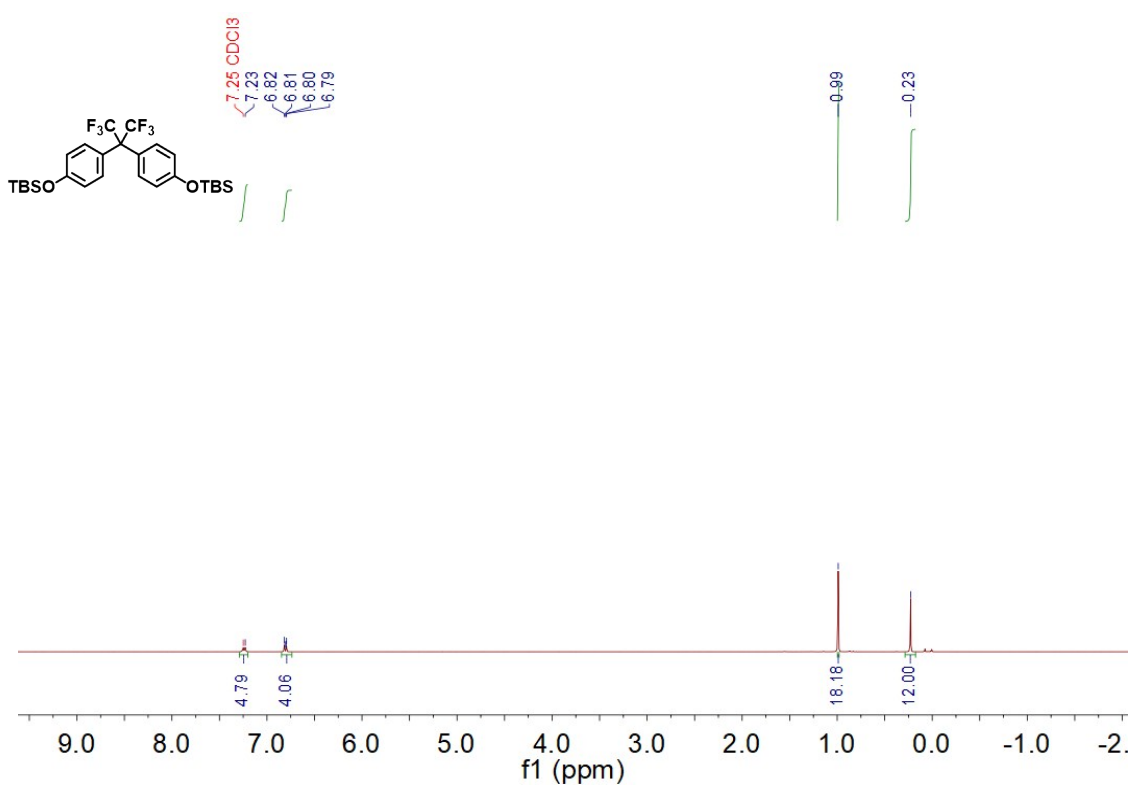

**<sup>13</sup>C NMR (1c)**

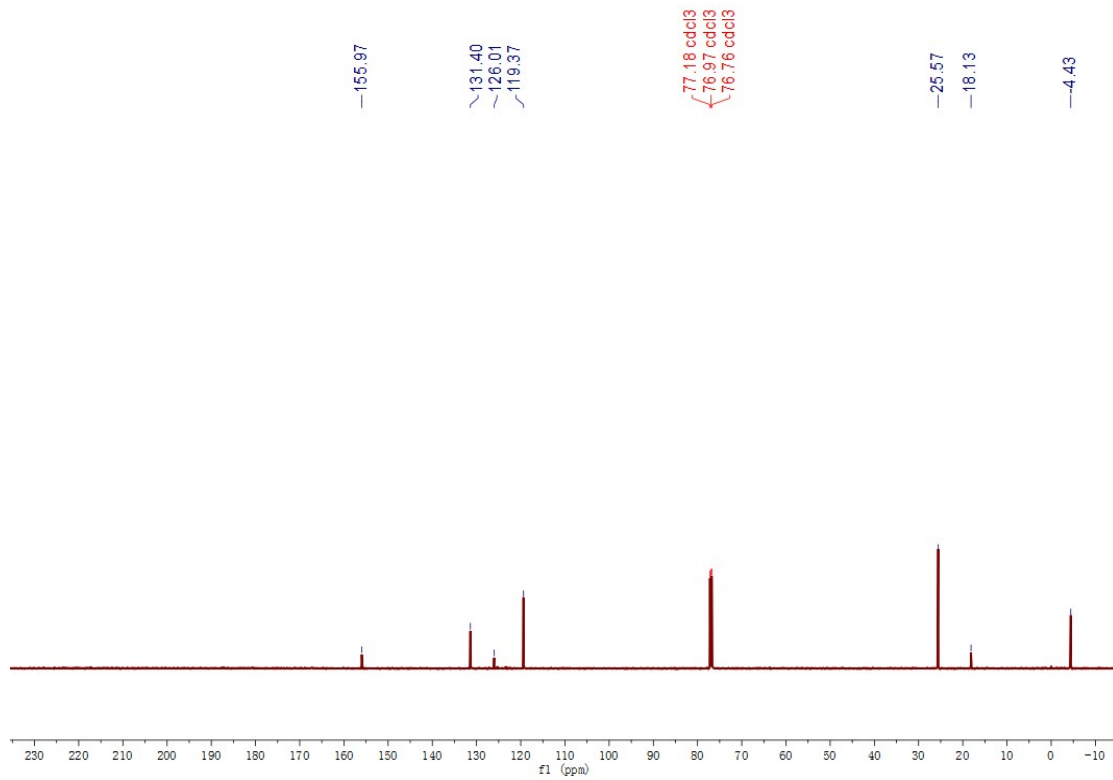

**<sup>1</sup>H NMR (TBMP-OTBS)**

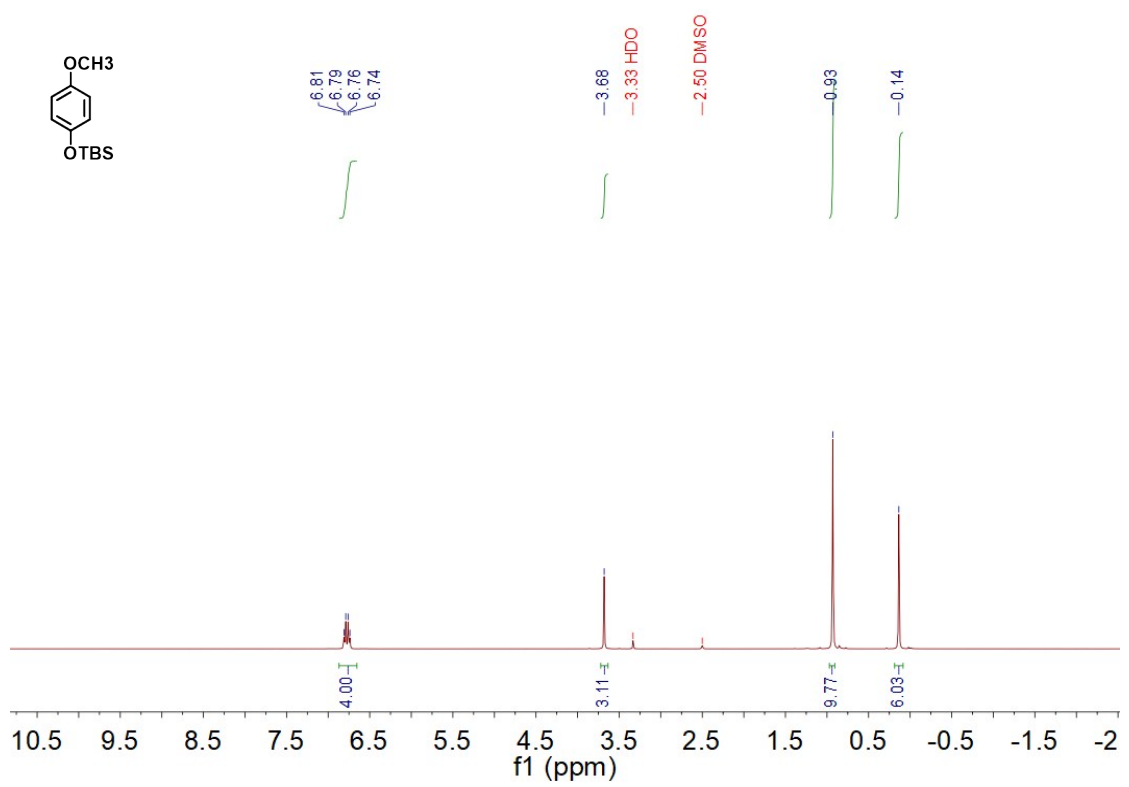

**<sup>13</sup>C NMR (TBMP-OTBS)**

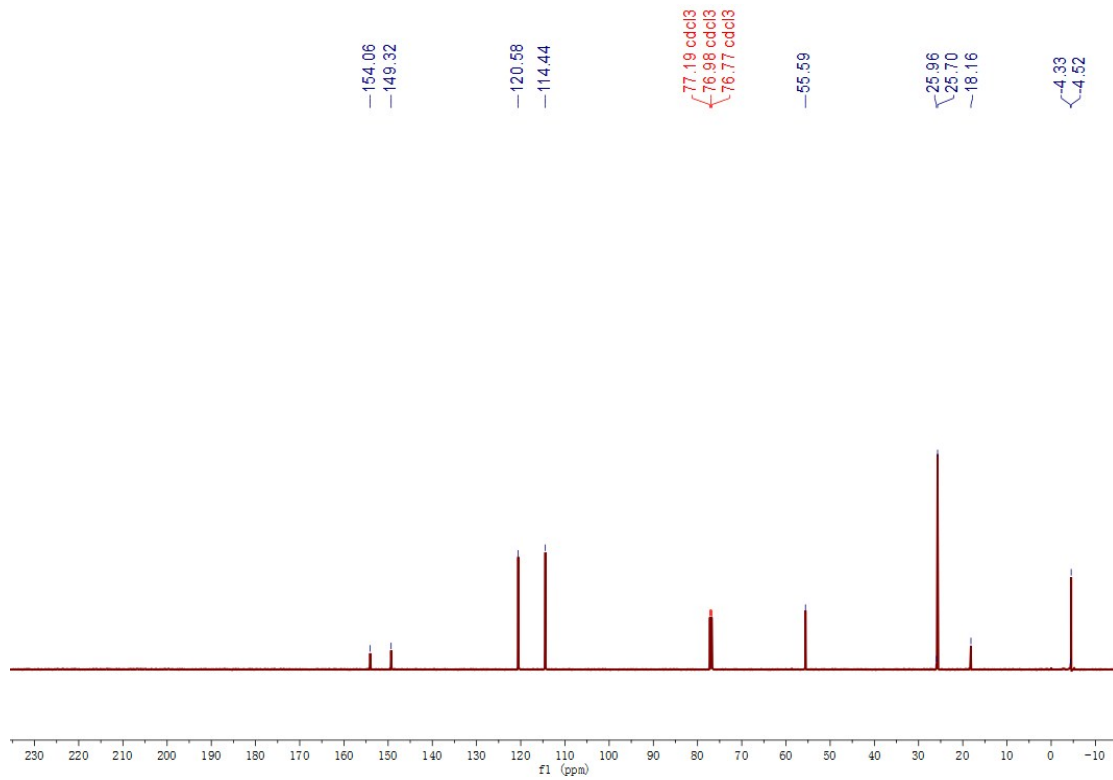

**<sup>1</sup>H NMR (TPE-OTBS)**

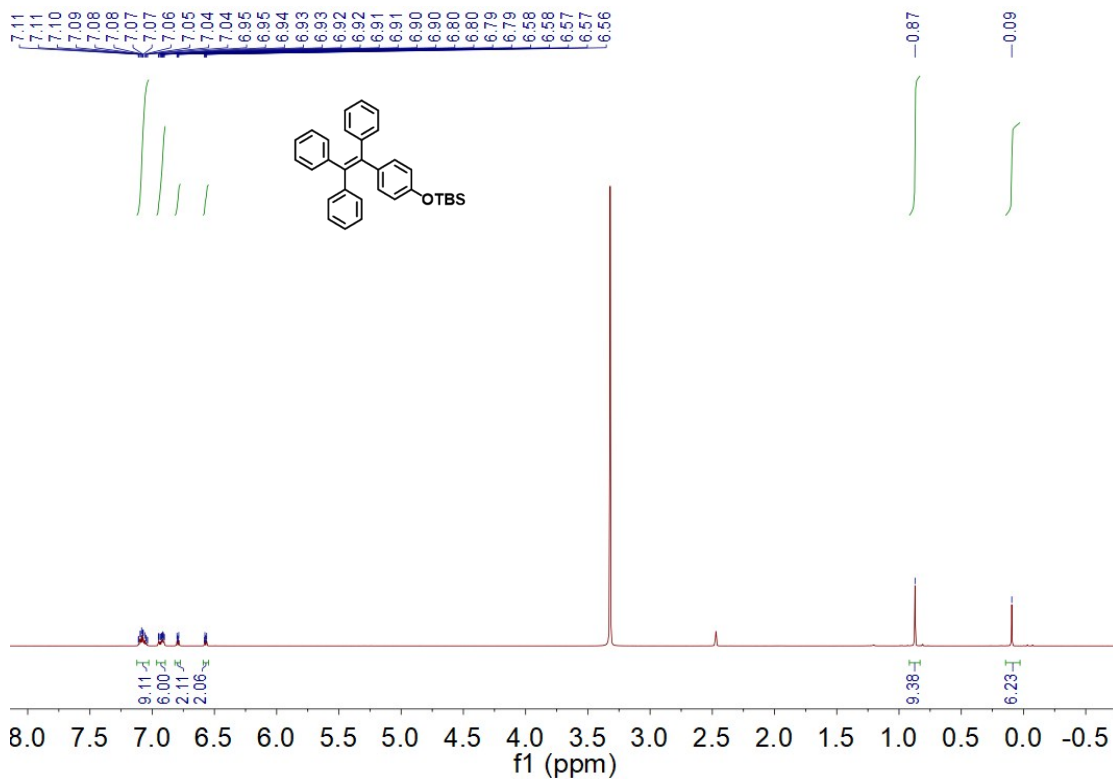

**<sup>1</sup>H NMR (PSFO1)**

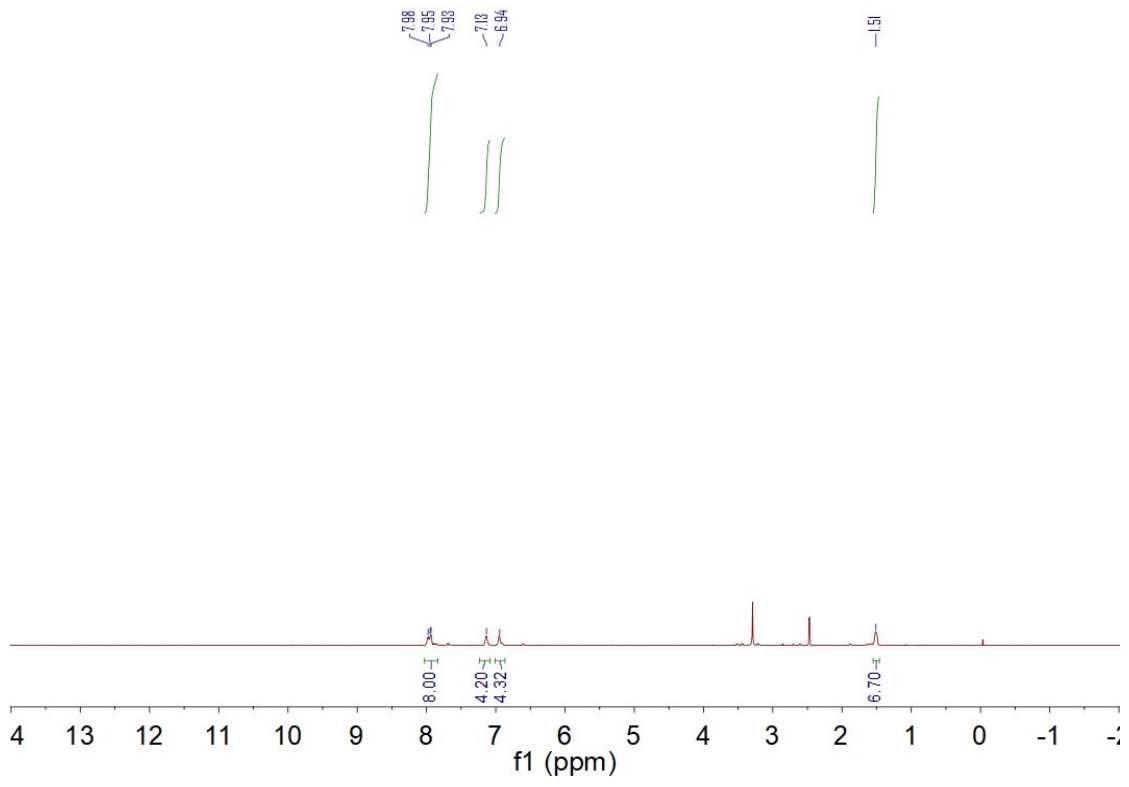

<sup>1</sup>H NMR (PSFO2)

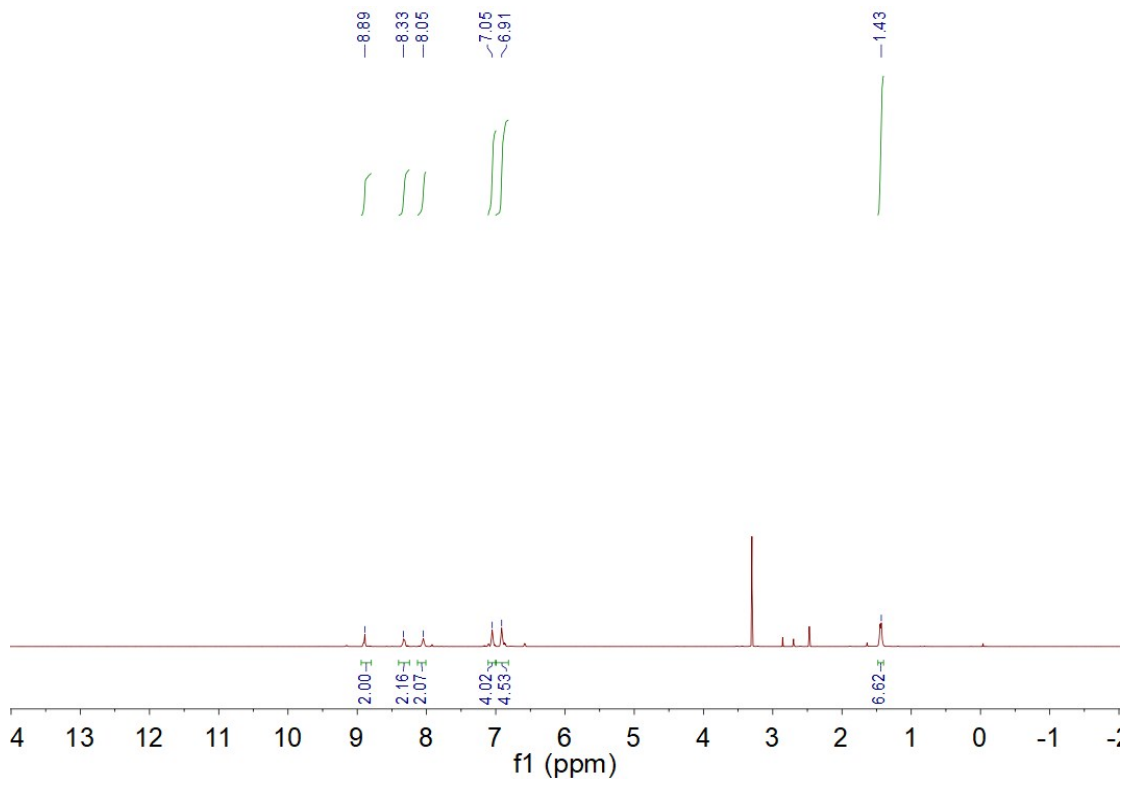

<sup>1</sup>H NMR (PSFO3)

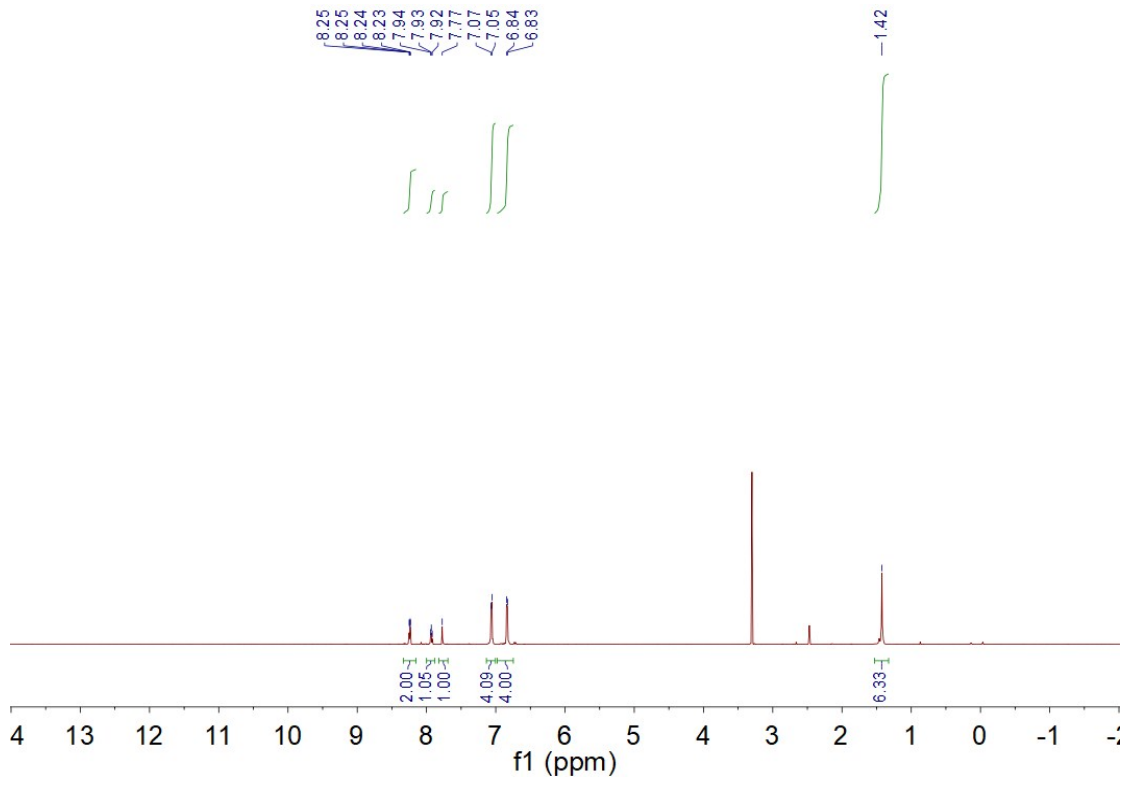

<sup>1</sup>H NMR (PSFO4)

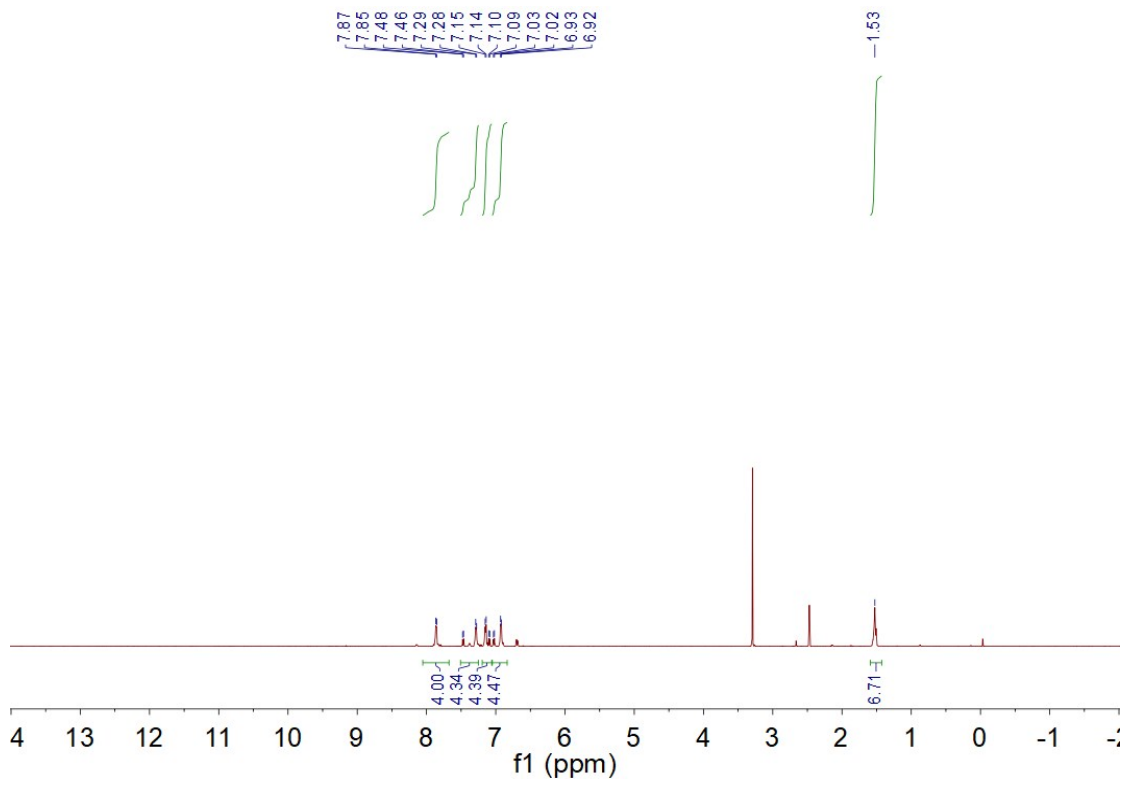

### <sup>1</sup>H NMR (PSFO1-TPP)

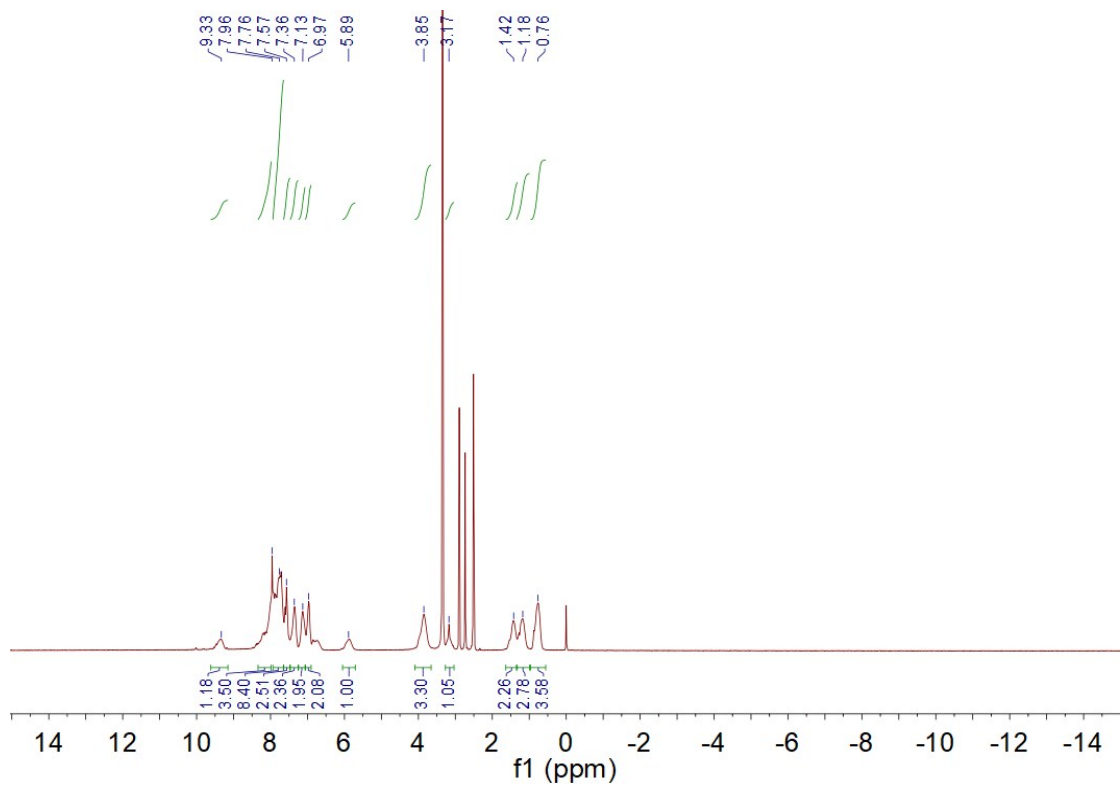

### <sup>1</sup>H NMR (PSFA1)

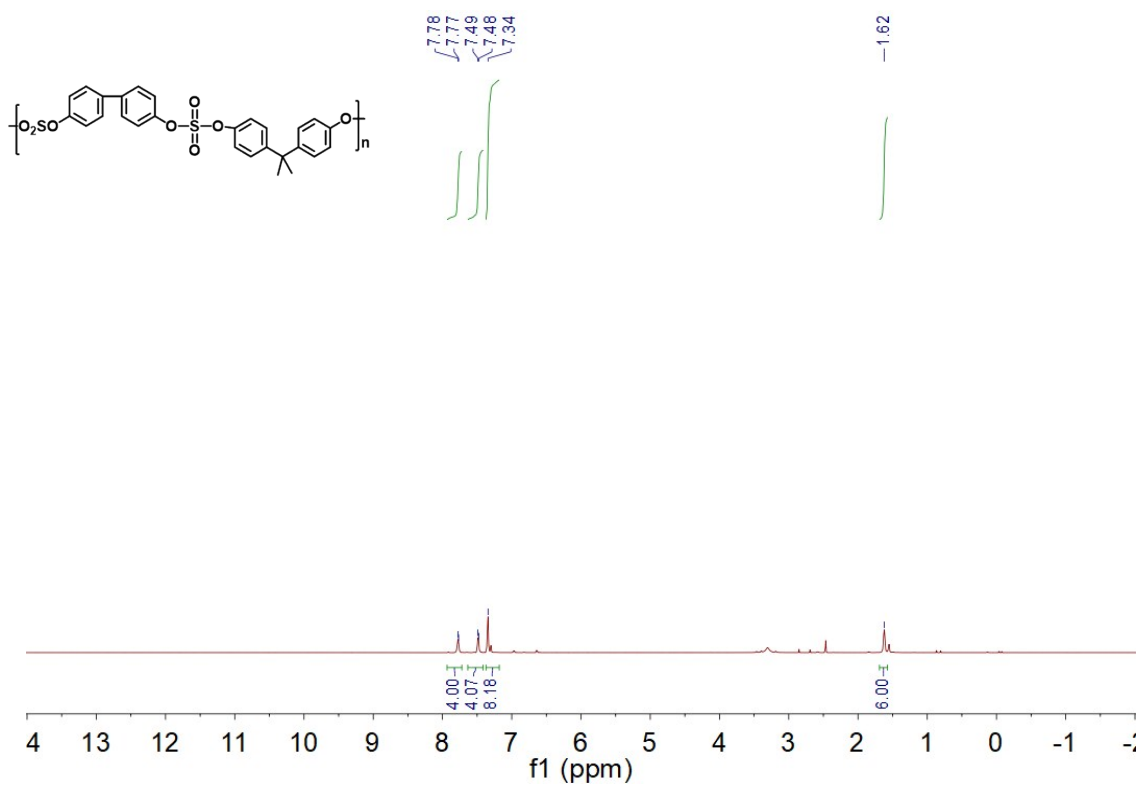

### <sup>1</sup>H NMR (PSFA2)

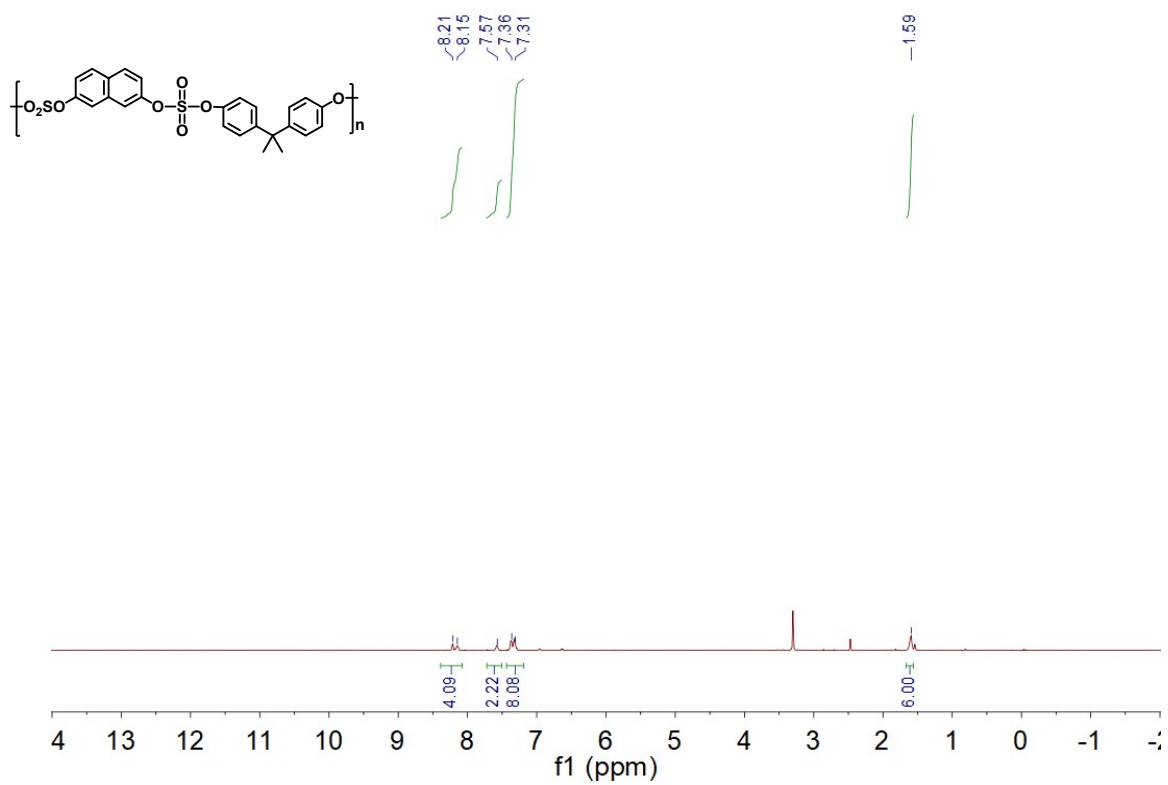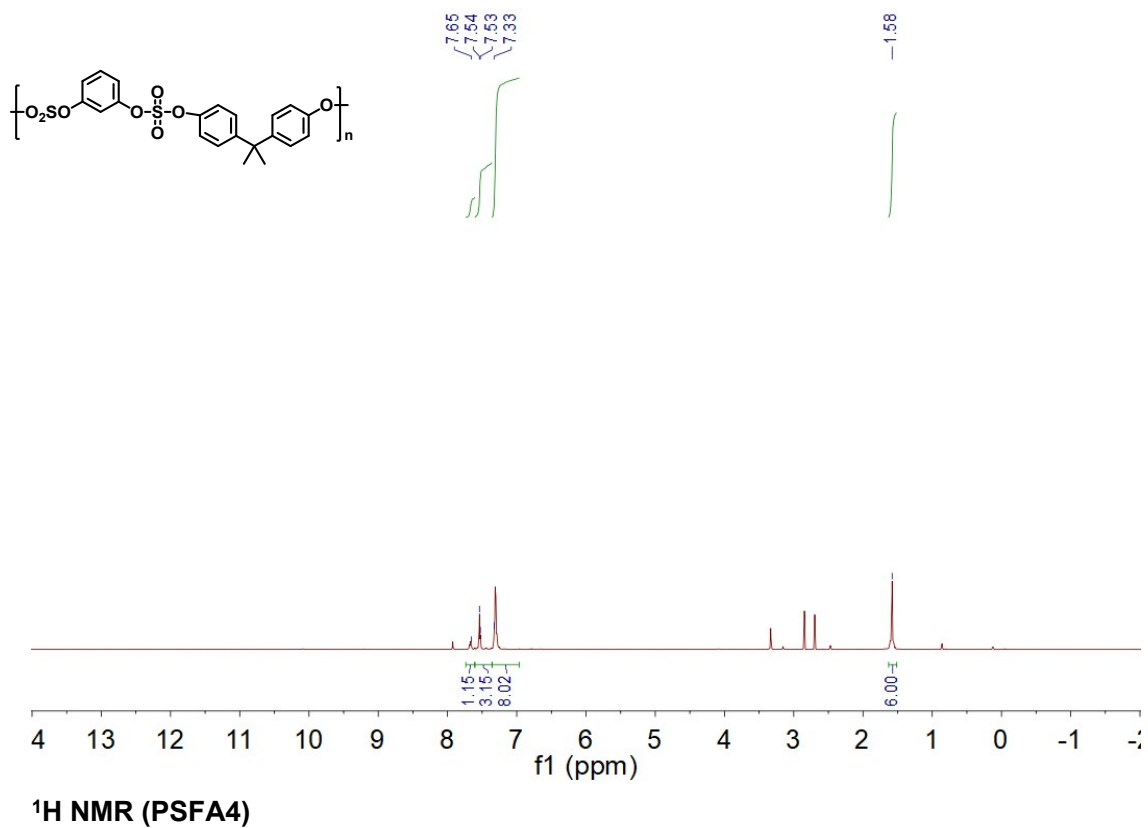

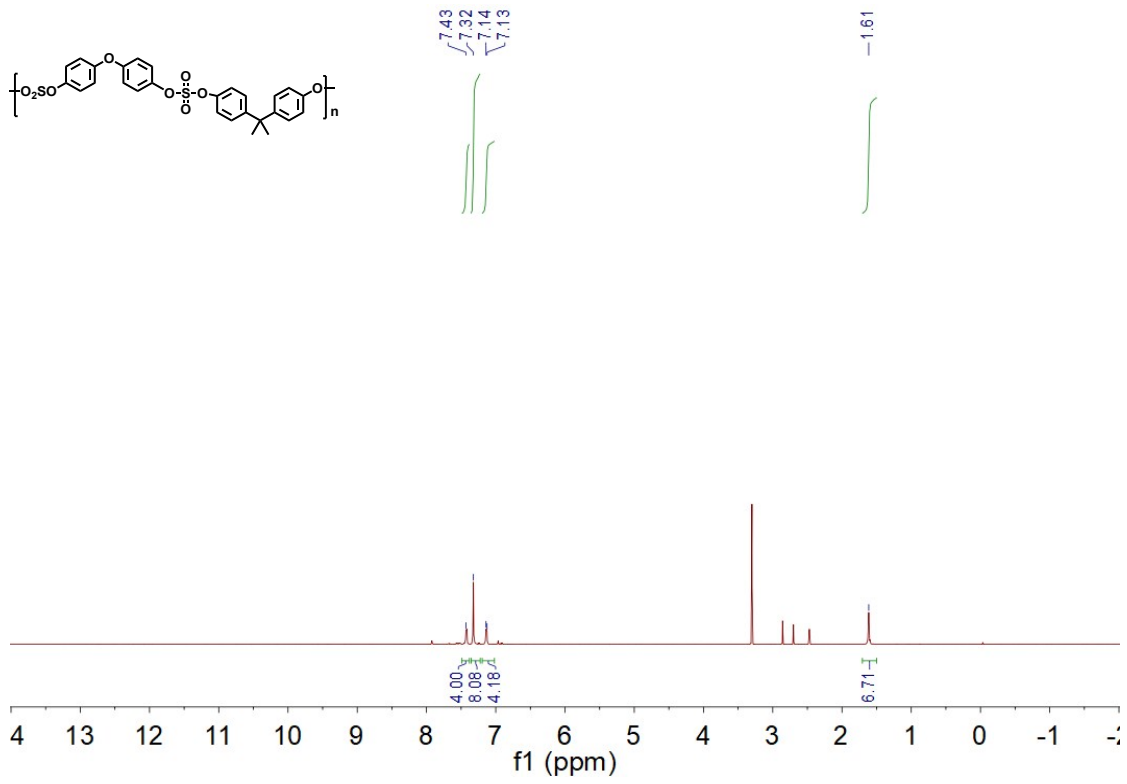

**<sup>1</sup>H NMR (PSFO1-TPP-CF<sub>3</sub>)**

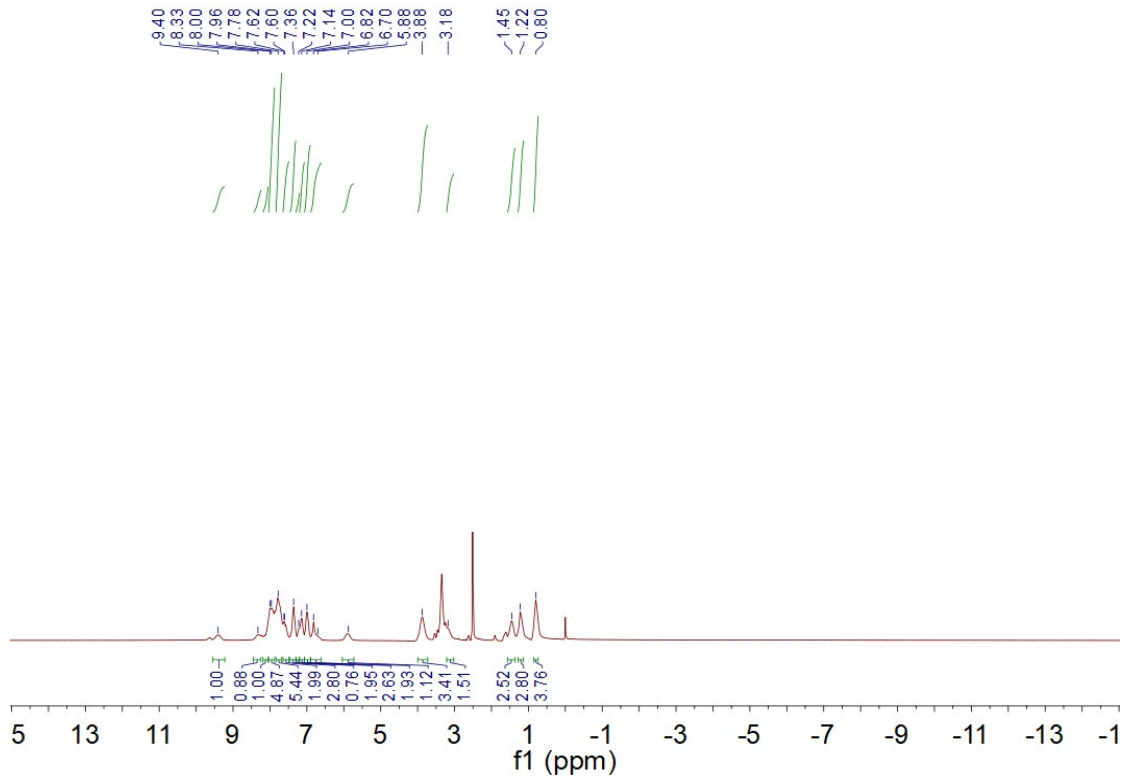



## Thermal gravimetric analysis (TGA) of Polysulfonates and polysulfates

### Thermal gravimetric analysis (TGA) of PSFO1

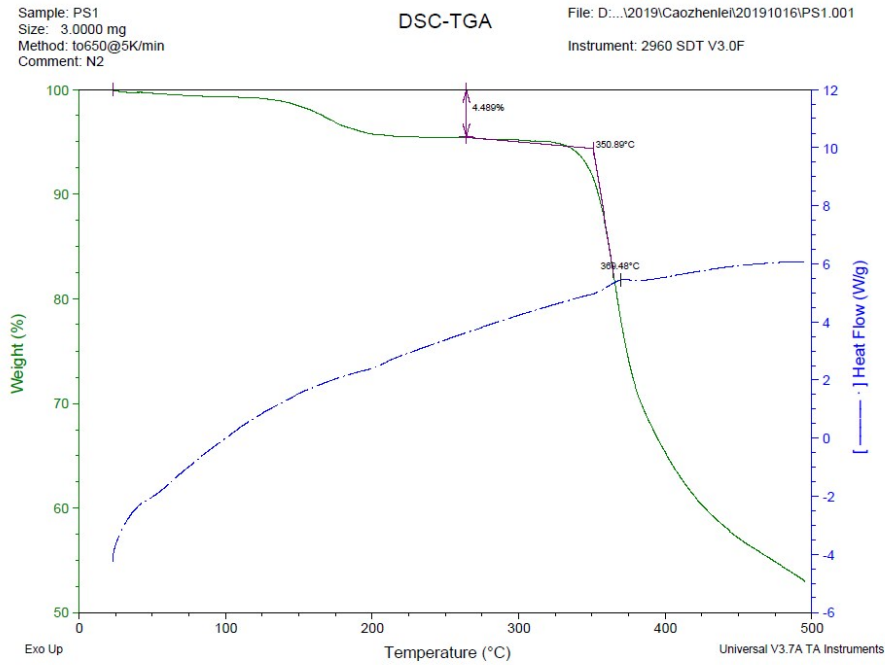

### Thermal gravimetric analysis (TGA) of PSFO2

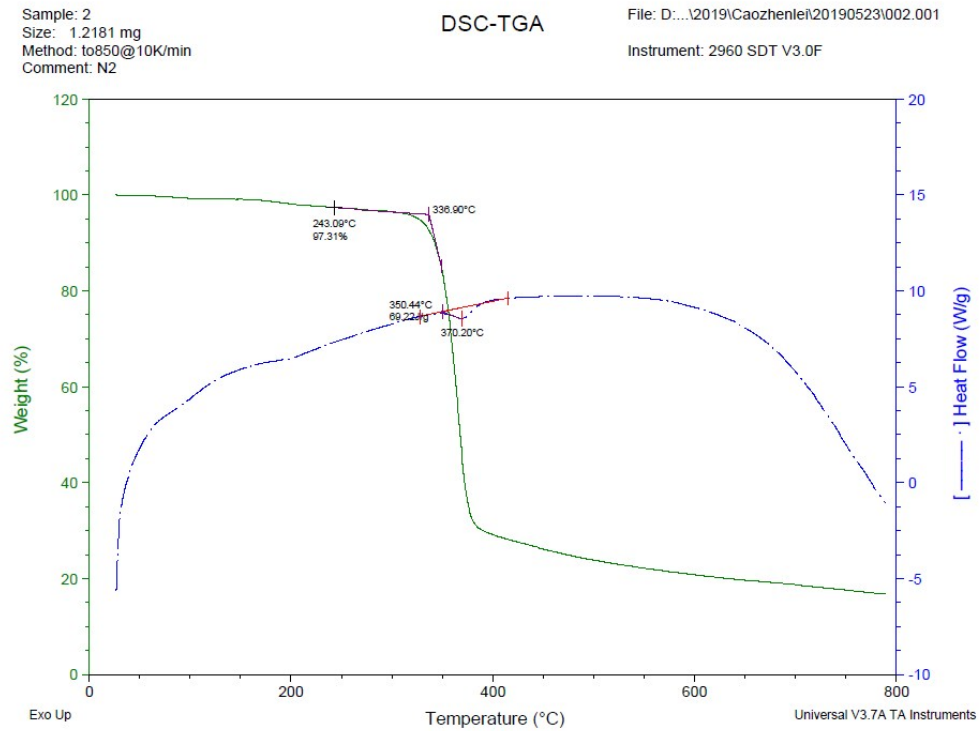

### Thermal gravimetric analysis (TGA) of PSFO3

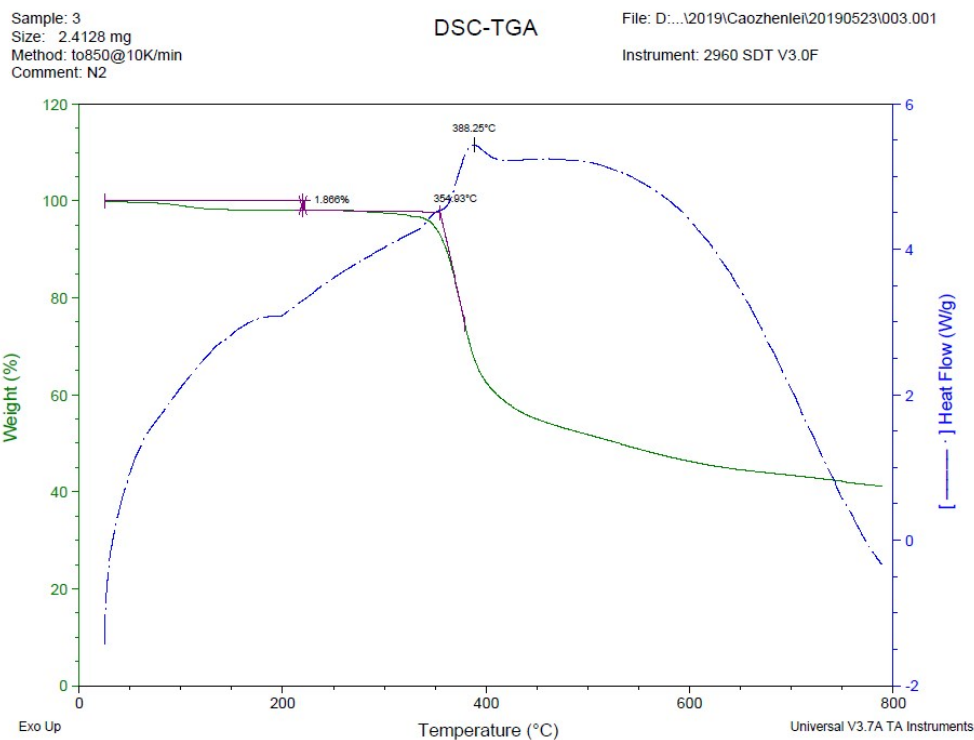

### Thermal gravimetric analysis (TGA) of PSFO4

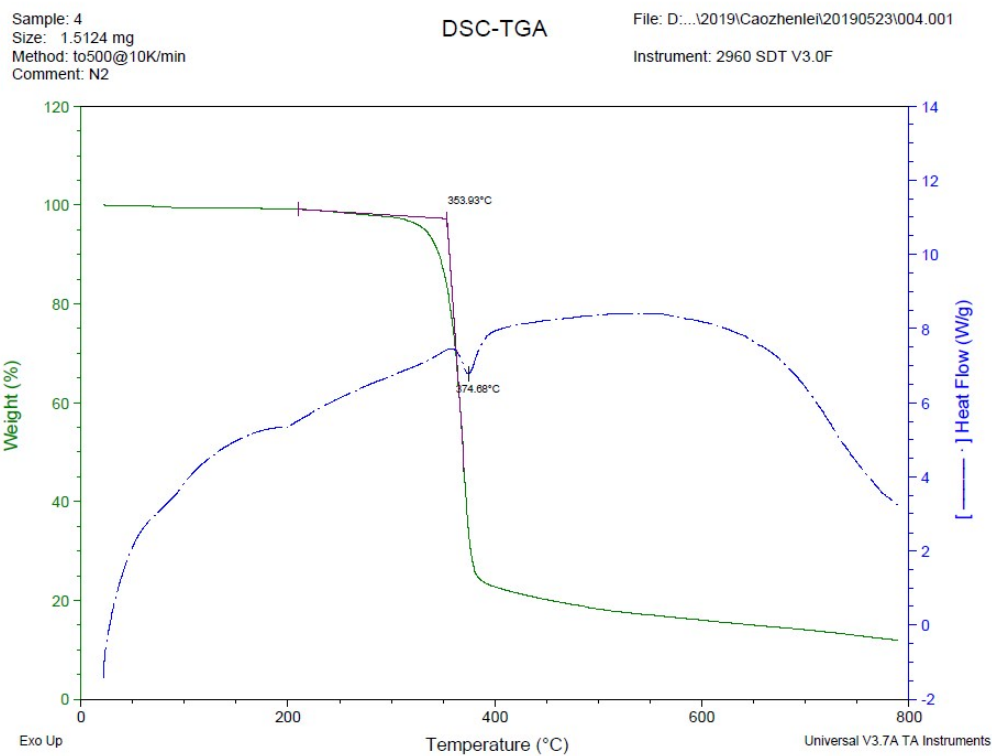

### Thermal gravimetric analysis (TGA) of PSFA1

Sample: 5  
Size: 1.5083 mg  
Method: to500@10K/min  
Comment: N2

### DSC-TGA

File: D:\...2019\Caozhenlei\20190523\005.001  
Instrument: 2960 SDT V3.0F

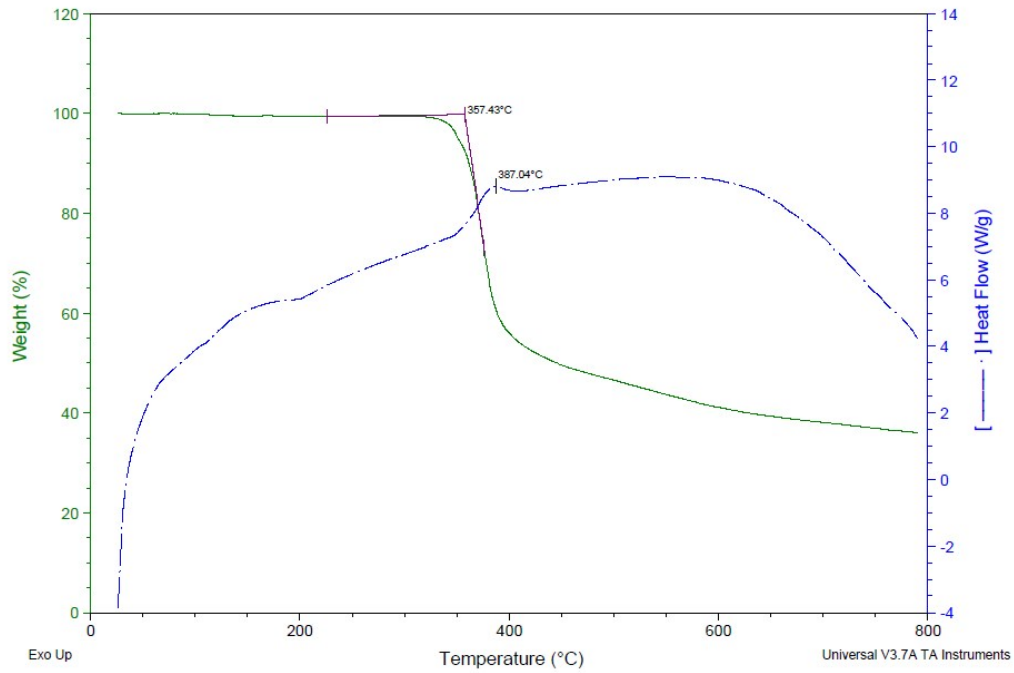

### Thermal gravimetric analysis (TGA) of PSFA2

Sample: PU3  
Size: 3.1726 mg  
Method: to650@5K/min  
Comment: N2

### DSC-TGA

File: D:\...2019\Caozhenlei\20191016\PU3.001  
Instrument: 2960 SDT V3.0F

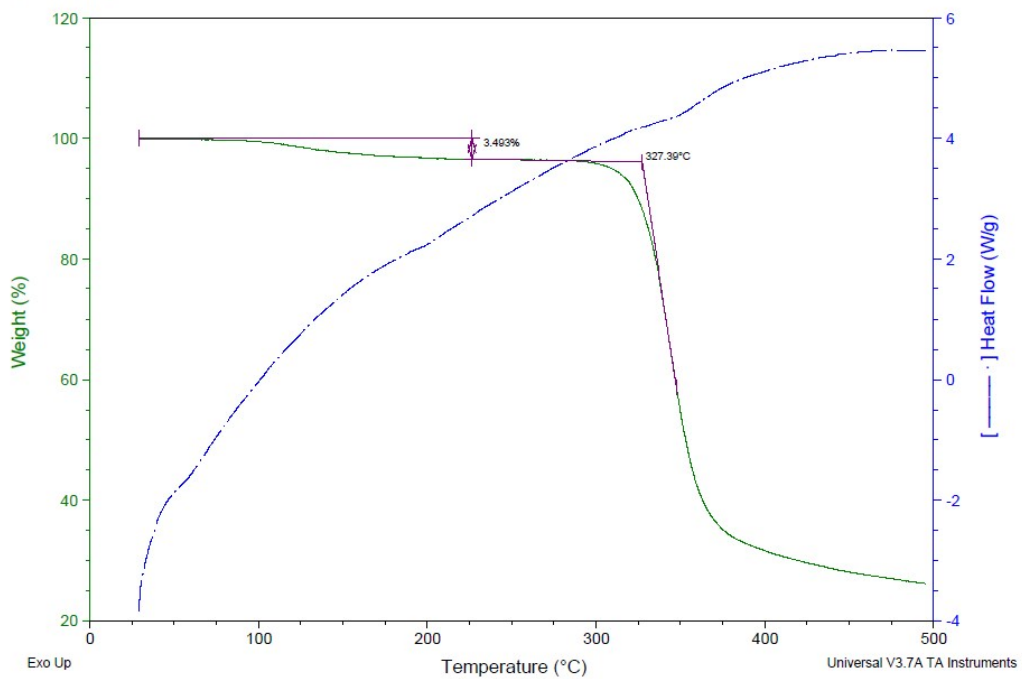

### Thermal gravimetric analysis (TGA) of PSFA3

Sample: 7  
Size: 0.7768 mg  
Method: to500@10K/min  
Comment: N2

### DSC-TGA

File: D:\...2019\Caozhenlei\20190603\007.001  
Instrument: 2960 SDT V3.0F

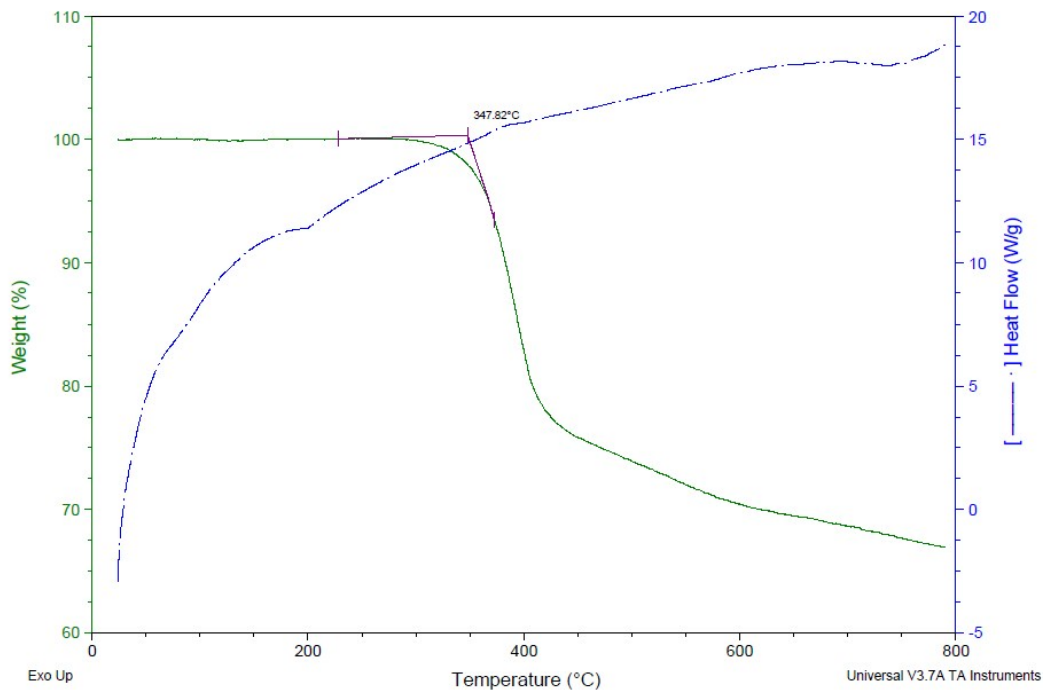

### Thermal gravimetric analysis (TGA) of PSFA4

Sample: PU4  
Size: 2.7075 mg  
Method: to650@5K/min  
Comment: N2

### DSC-TGA

File: D:\...2019\Caozhenlei\20191016\PU4.001  
Instrument: 2960 SDT V3.0F

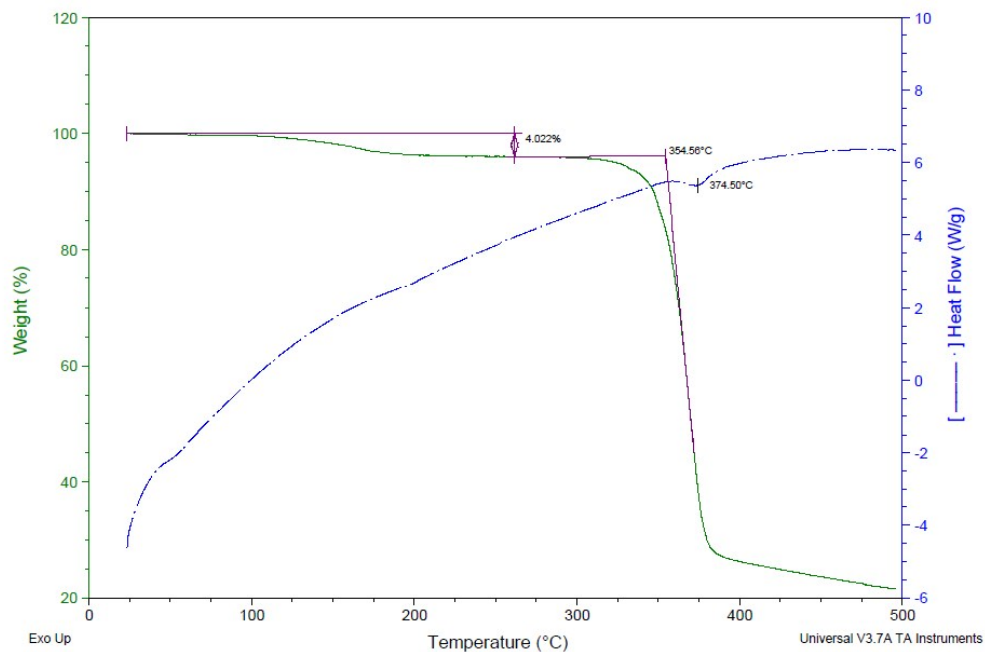

## IR Spectroscopic Analysis

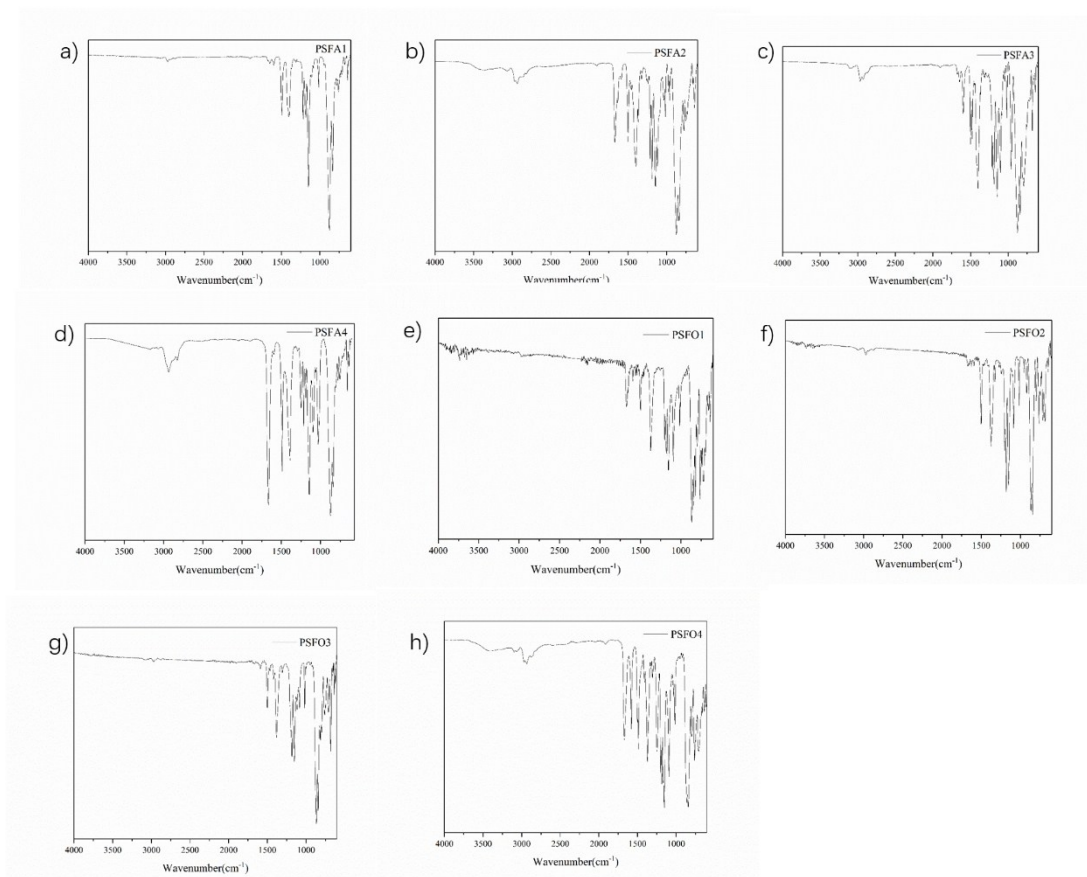

The IR spectra of (a)PSFA1, (b)PSFA2, (c)PSFA3, (d) PSFA4, (e)PSFO1, (f) PSFO2, (g)PSFO3, (h)PSFO4

# GPC Results

GPC trace of the PSFO1.

| Catalyst | Sample Name | RT (min) | Mn    | Mw     | MP     | Mz     | Poly-dispersity |
|----------|-------------|----------|-------|--------|--------|--------|-----------------|
| C1       | PSFO1       | 24.250   | 73659 | 105266 | 141924 | 139951 | 1.429           |
| C2       | PSFO1       | 31.597   | 13415 | 17730  | 15970  | 23037  | 1.322           |

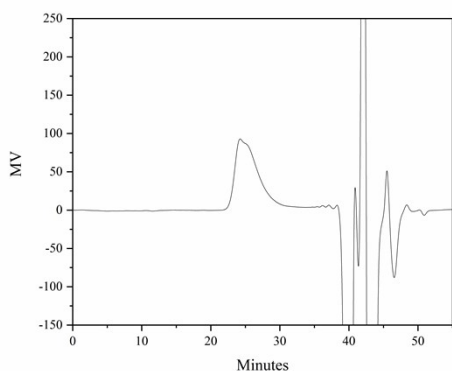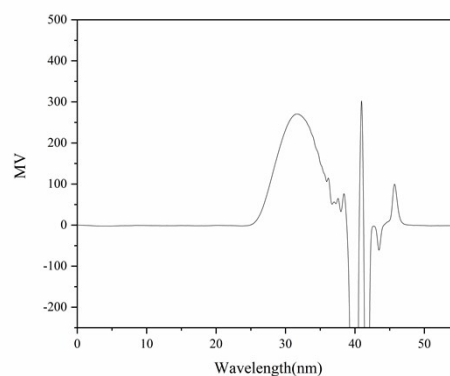

GPC trace of the PSFO2.

| Catalyst | Sample Name | RT (min) | Mn    | Mw    | MP    | Mz    | Poly-dispersity |
|----------|-------------|----------|-------|-------|-------|-------|-----------------|
| C1       | PSFO2       | 27.081   | 31920 | 47095 | 49739 | 65284 | 1.475           |
| C2       | PSFO2       | 28.289   | 23867 | 36447 | 38932 | 50939 | 1.527           |

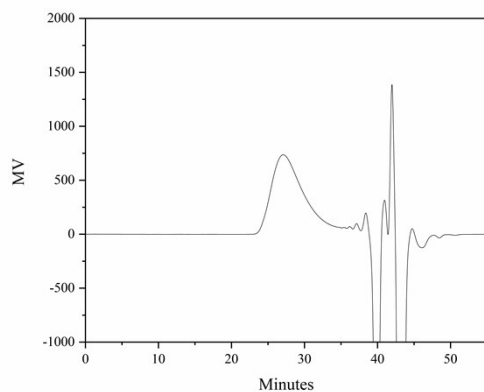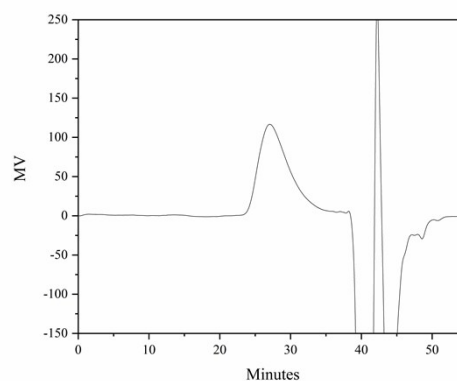

GPC trace of the PSFO3.

| Catalyst | Sample Name | RT (min) | Mn    | Mw    | MP    | Mz    | Poly-dispersity |
|----------|-------------|----------|-------|-------|-------|-------|-----------------|
| C1       | PSFO3       | 29.025   | 20737 | 30536 | 30989 | 43374 | 1.472           |
| C2       | PSFO3       | 31.700   | 12764 | 16430 | 15433 | 20729 | 1.287           |

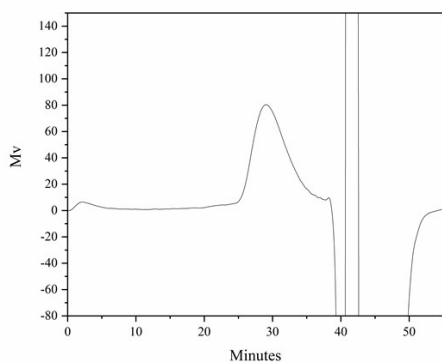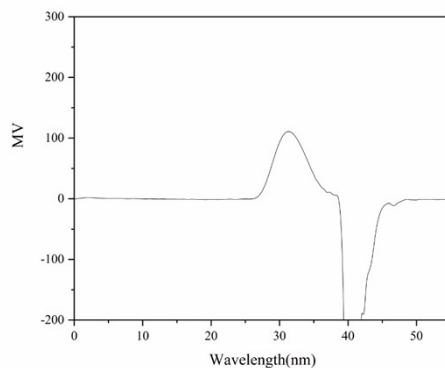

**GPC trace of the PSFO4.**

| Catalyst | Sample Name | RT (min) | Mn    | Mw    | MP    | Mz     | Poly-dispersity |
|----------|-------------|----------|-------|-------|-------|--------|-----------------|
| C1       | PSFO3       | 25.094   | 49333 | 74861 | 77864 | 105185 | 1.517           |
| C2       | PSFO3       | 30.217   | 17070 | 21540 | 20616 | 27332  | 1.262           |

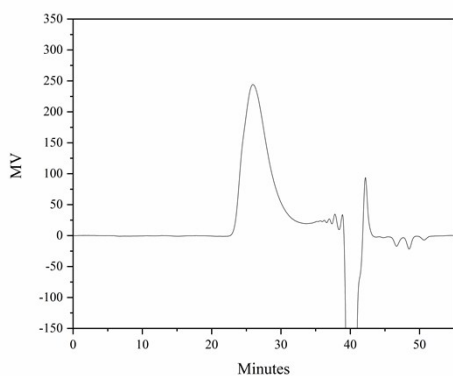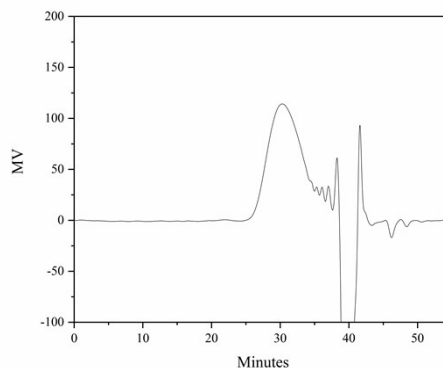

**GPC trace of the PSFA1.**

| Catalyst | Sample Name | RT (min) | Mn    | Mw    | MP    | Mz    | Poly-dispersity |
|----------|-------------|----------|-------|-------|-------|-------|-----------------|
| C1       | PSFA1       | 26.098   | 38640 | 61583 | 66936 | 89082 | 1.594           |
| C2       | PSFA1       | 27.046   | 33738 | 54162 | 57977 | 78818 | 1.605           |

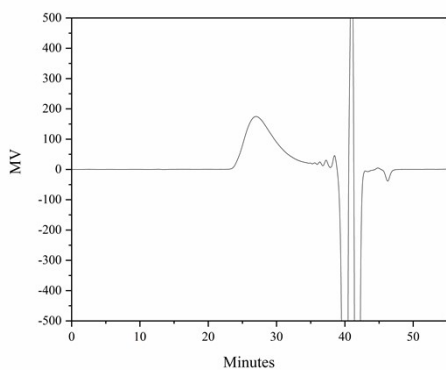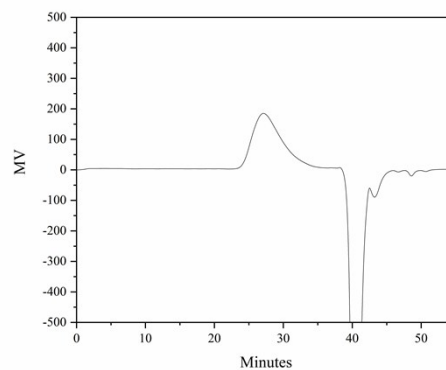

**GPC trace of the PSFA2.**

| Catalyst | Sample Name | RT (min) | Mn    | Mw    | MP    | Mz    | Poly-dispersity |
|----------|-------------|----------|-------|-------|-------|-------|-----------------|
| C1       | PSFA2       | 28.036   | 21915 | 29542 | 30906 | 38401 | 1.348           |
| C2       | PSFA2       | 28.242   | 25021 | 37506 | 39489 | 52835 | 1.499           |

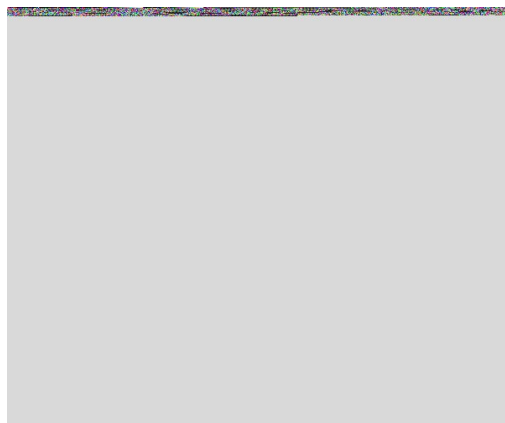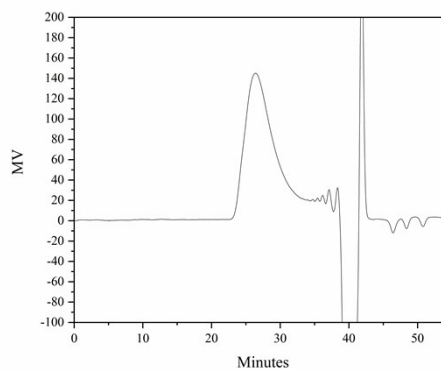

**GPC trace of the PSFA3.**

| Catalyst | Sample Name | RT (min) | Mn    | Mw    | MP    | Mz    | Poly-dispersity |
|----------|-------------|----------|-------|-------|-------|-------|-----------------|
| C1       | PSFA3       | 30.016   | 17151 | 24044 | 24070 | 32315 | 1.402           |
| C2       | PSFA3       | 29.105   | 20859 | 29644 | 29770 | 39855 | 1.421           |

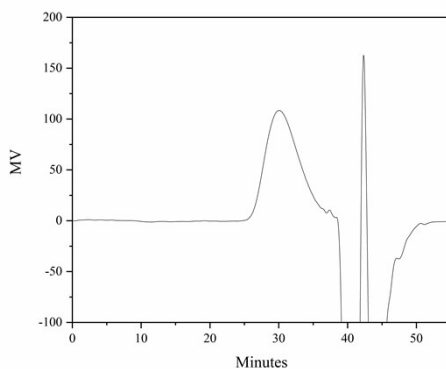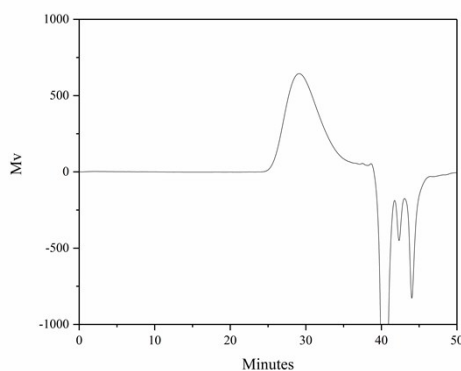



**GPC trace of the PSFA4.**

| Catalyst | Sample Name | RT (min) | Mn    | Mw    | MP    | Mz     | Poly-dispersity |
|----------|-------------|----------|-------|-------|-------|--------|-----------------|
| C1       | PSFA3       | 25.941   | 46290 | 46290 | 73356 | 94528  | 1.494           |
| C2       | PSFA3       | 25.569   | 55821 | 81315 | 82461 | 110280 | 1.457           |

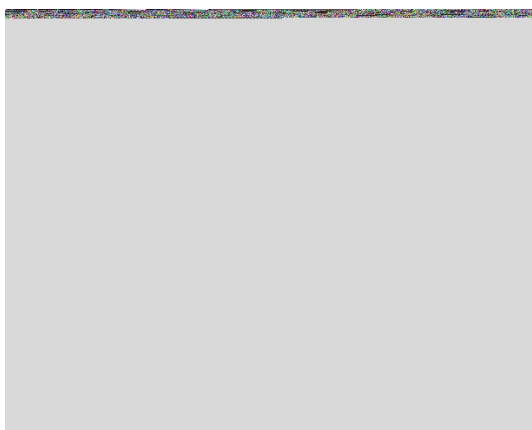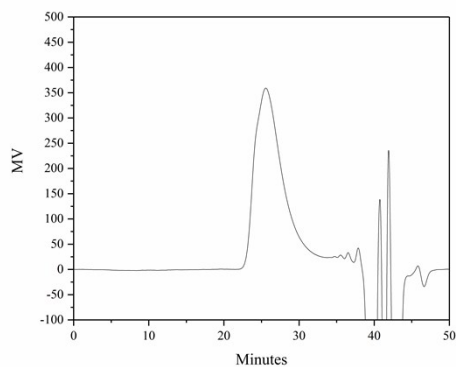

| Sample Name | RT (min) | Mn    | Mw     | MP     | Mz     | Poly-dispersity |
|-------------|----------|-------|--------|--------|--------|-----------------|
|             | 24.250   | 73659 | 105266 | 141924 | 139951 | 1.429           |

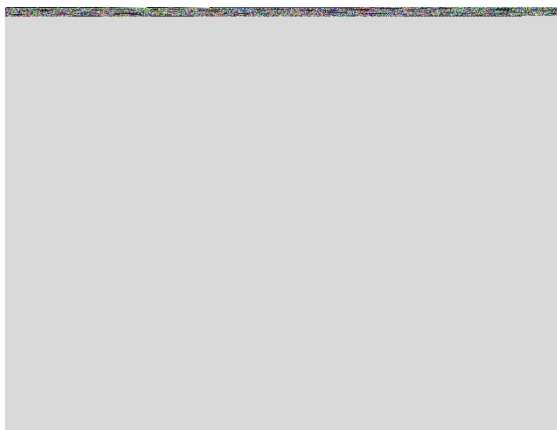

| Sample Name | RT (min) | Mn    | Mw     | MP     | Mz     | Poly-dispersity |
|-------------|----------|-------|--------|--------|--------|-----------------|
|             | 24.016   | 71160 | 121311 | 161817 | 173892 | 1.705           |

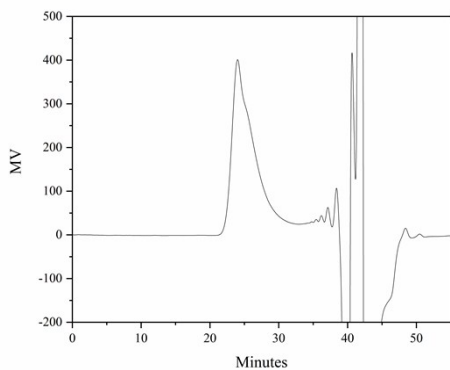

| Sample Name | RT (min) | Mn    | Mw     | MP     | Mz     | Poly-dispersity |
|-------------|----------|-------|--------|--------|--------|-----------------|
|             | 24.005   | 69845 | 121006 | 162591 | 174301 | 1.732           |

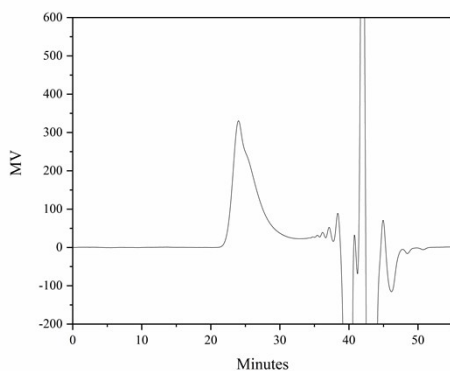

| Sample Name | RT (min) | Mn    | Mw     | MP     | Mz     | Poly-dispersity |
|-------------|----------|-------|--------|--------|--------|-----------------|
|             | 24.053   | 61418 | 111630 | 111630 | 165090 | 1.818           |

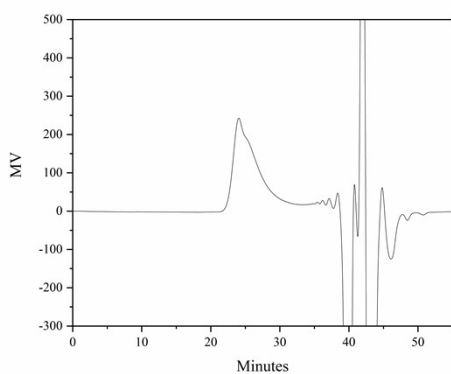

| Sample Name | RT (min) | Mn    | Mw     | MP     | Mz     | Poly-dispersity |
|-------------|----------|-------|--------|--------|--------|-----------------|
|             | 24.083   | 72065 | 112253 | 153025 | 157467 | 1.558           |

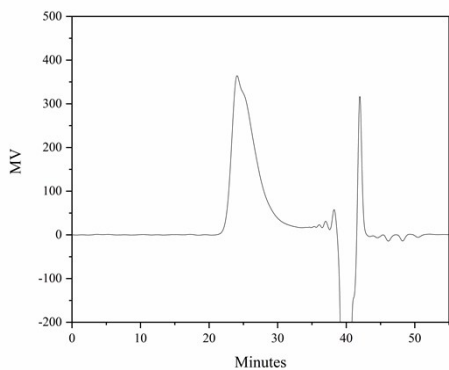

| Sample Name | RT (min) | Mn    | Mw    | MP    | Mz    | Poly-dispersity |
|-------------|----------|-------|-------|-------|-------|-----------------|
| PSFO1       | 26.248   | 35677 | 59257 | 64181 | 84908 | 1.661           |

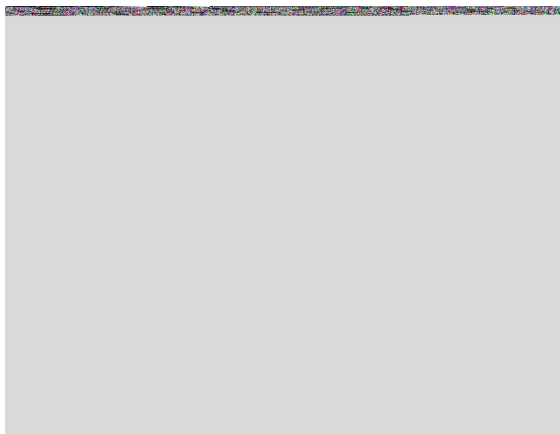

| Sample Name | RT (min) | Mn    | Mw    | MP    | Mz    | Poly-dispersity |
|-------------|----------|-------|-------|-------|-------|-----------------|
| 5%          | 32.929   | 11326 | 12731 | 11885 | 14146 | 1.124           |

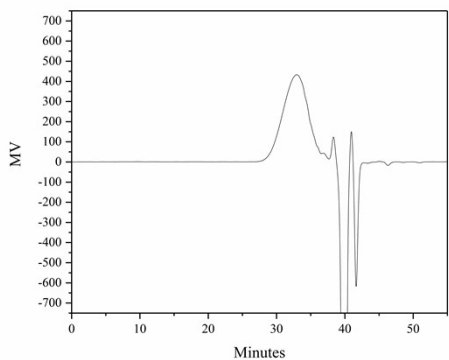

| Sample Name | RT (min) | Mn    | Mw    | MP    | Mz    | Poly-dispersity |
|-------------|----------|-------|-------|-------|-------|-----------------|
| 10%         | 33.431   | 10184 | 11195 | 10762 | 12177 | 1.099           |

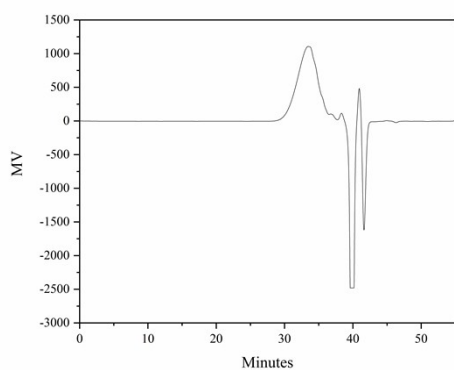

| Sample Name | RT (min) | Mn    | Mw    | MP    | Mz    | Poly-dispersity |
|-------------|----------|-------|-------|-------|-------|-----------------|
| 20%         | 33.244   | 10889 | 12145 | 11173 | 13369 | 1.115           |

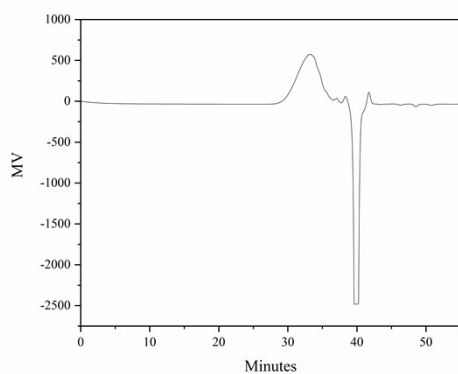

| Sample Name | RT (min) | Mn    | Mw    | MP    | Mz    | Poly-dispersity |
|-------------|----------|-------|-------|-------|-------|-----------------|
| 30%         | 33.697   | 10137 | 11115 | 10186 | 12047 | 1.097           |

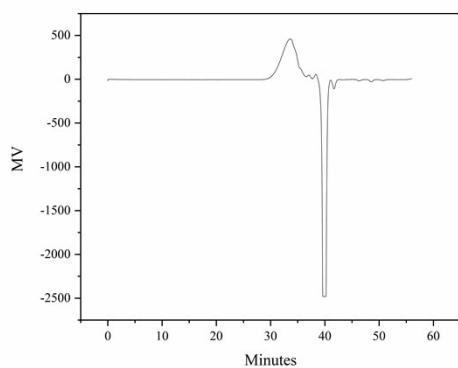

## References

1. Wang, H.; Zhou, F.; Ren, G.; Zheng, Q.; Chen, H.; Gao, B.; Klivansky, L.; Liu, Y.;

Wu, B.; Xu, Q.; Lu, J.; Sharpless, K. B.; Wu, P., SuFEx-Based Polysulfonate Formation from Ethenesulfonyl Fluoride-Amine Adducts. *Angewandte Chemie-International Edition* **2017**, *56* (37), 11203-11208.

2. Feng, L.; Cavicchi, K. A.; Katzenmeyer, B. C.; Wesdemiotis, C., Synthesis of  $\omega$ -sulfonated polystyrene via reversible addition fragmentation chain transfer polymerization and postpolymerization modification. *Journal of Polymer Science Part A: Polymer Chemistry* **2011**, *49* (23), 5100-5108.
